# Supplementary material
Source: PubMed Central journal article supplement (PMC8641698)

A time series plot of all RTs for all subjects in Experiment 1

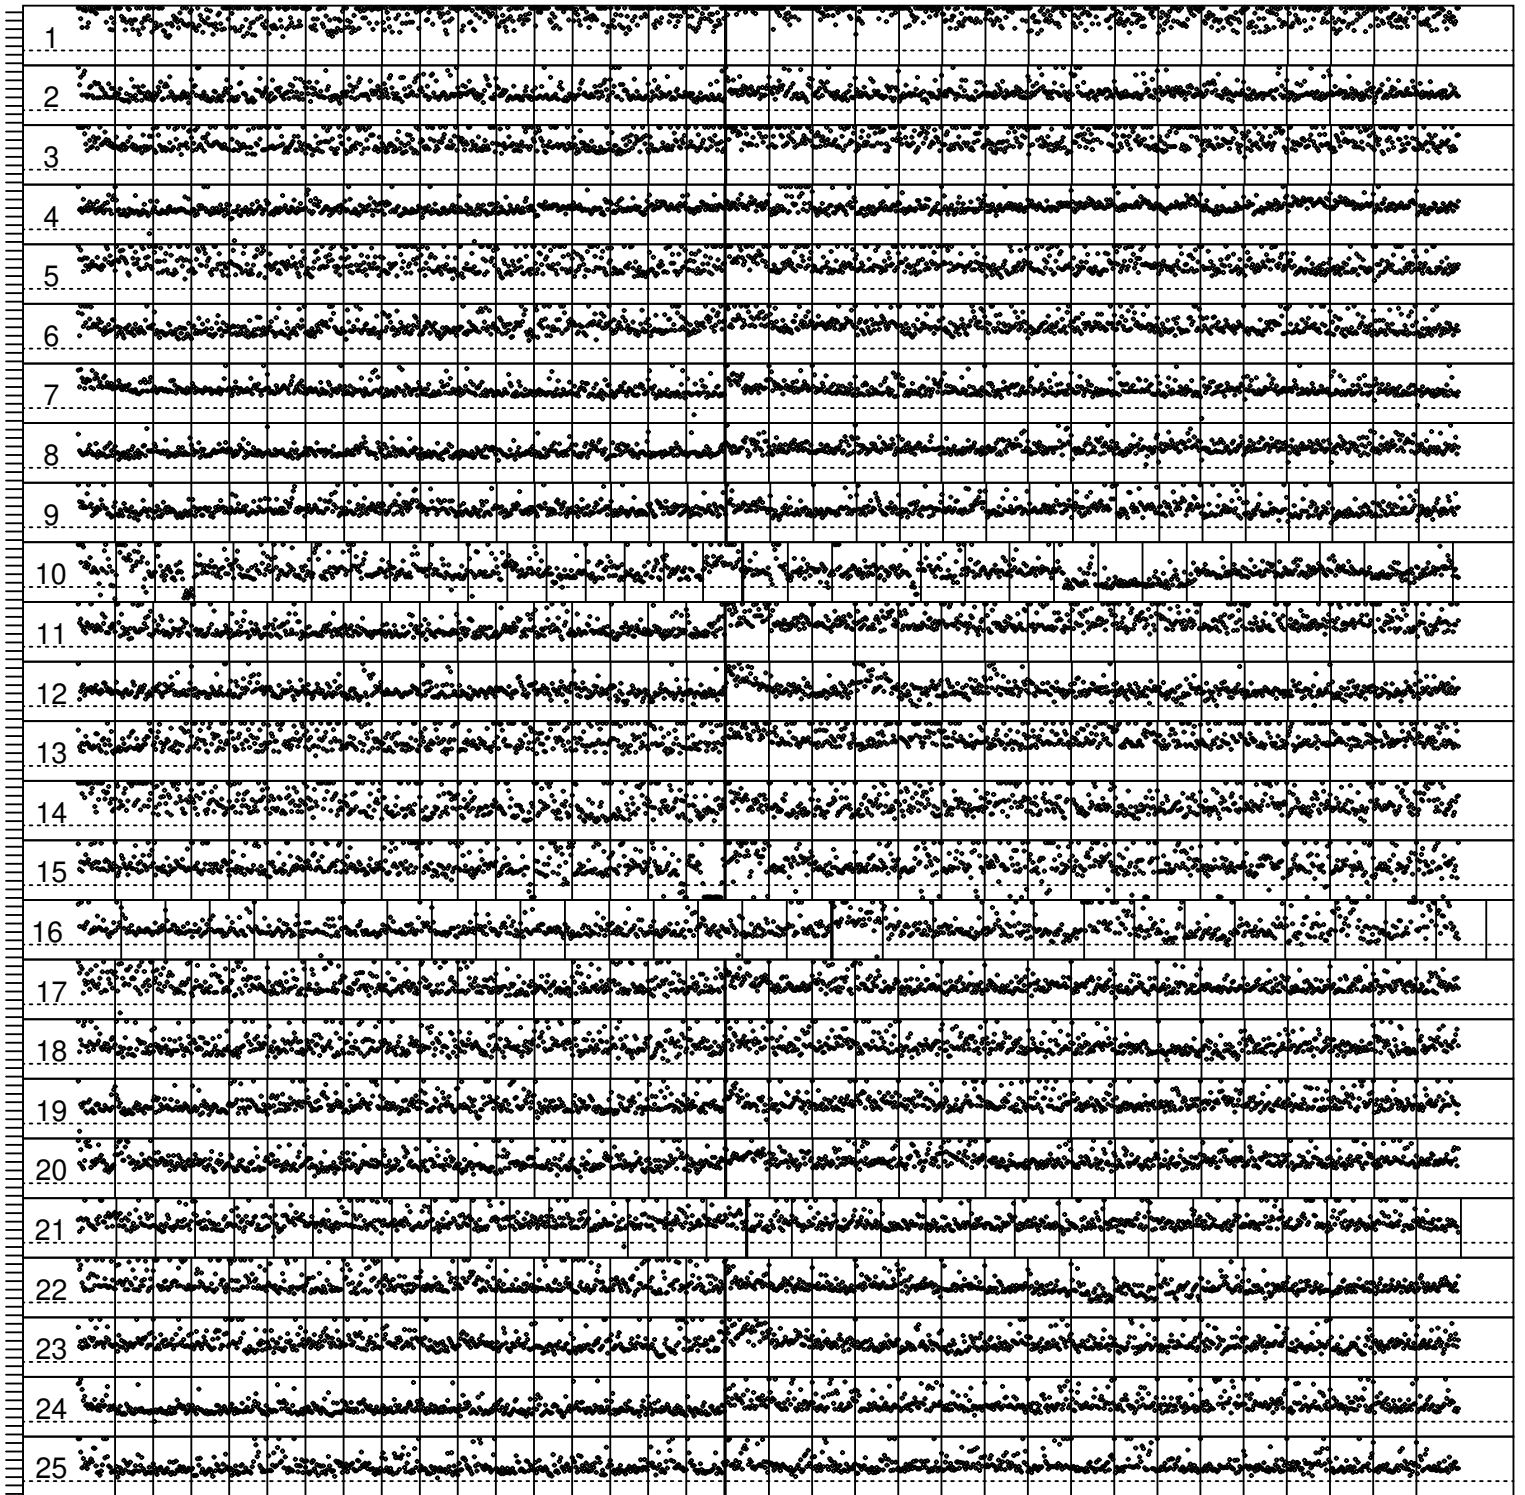

A time series plot of all RTs for all subjects in Experiment 1

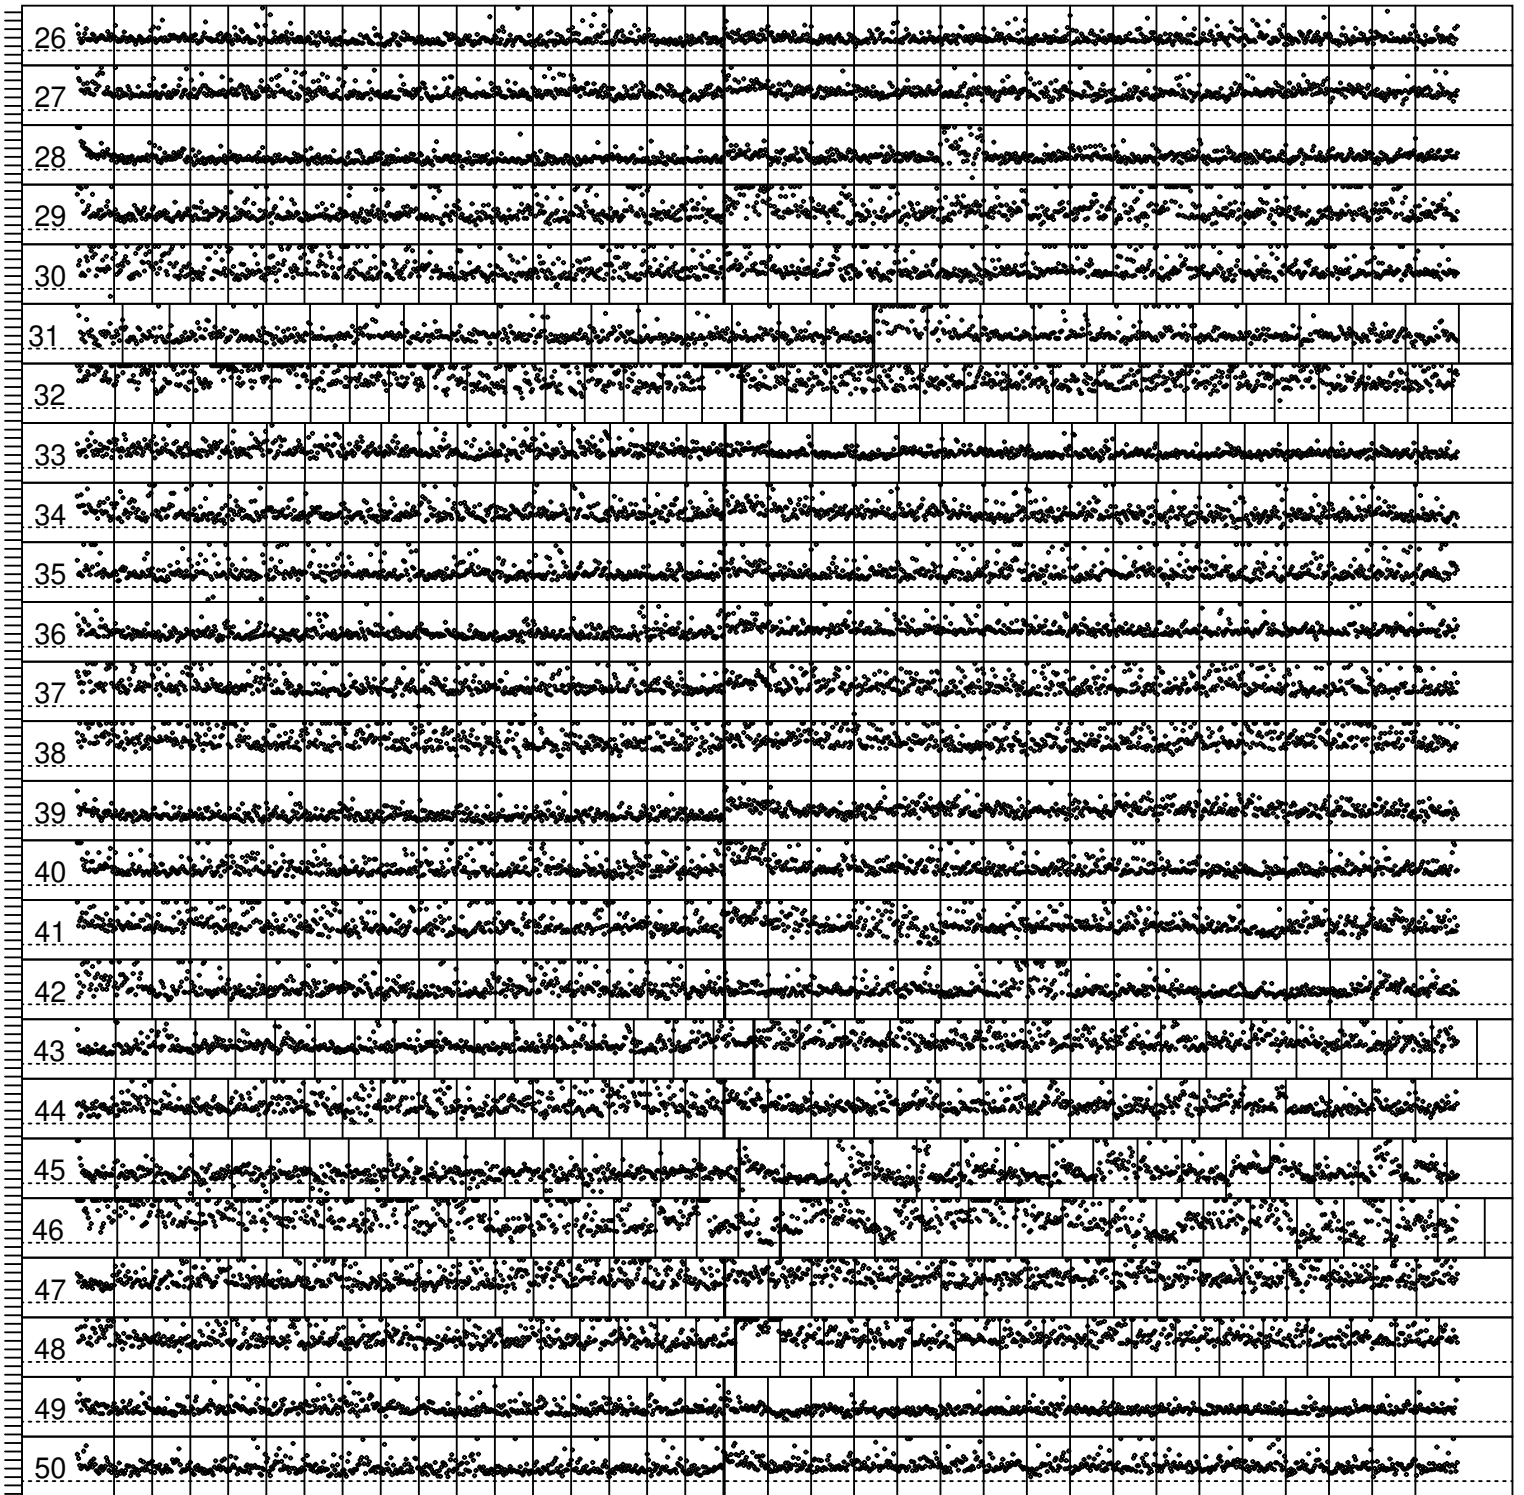

A time series plot of all RTs for all subjects in Experiment 1

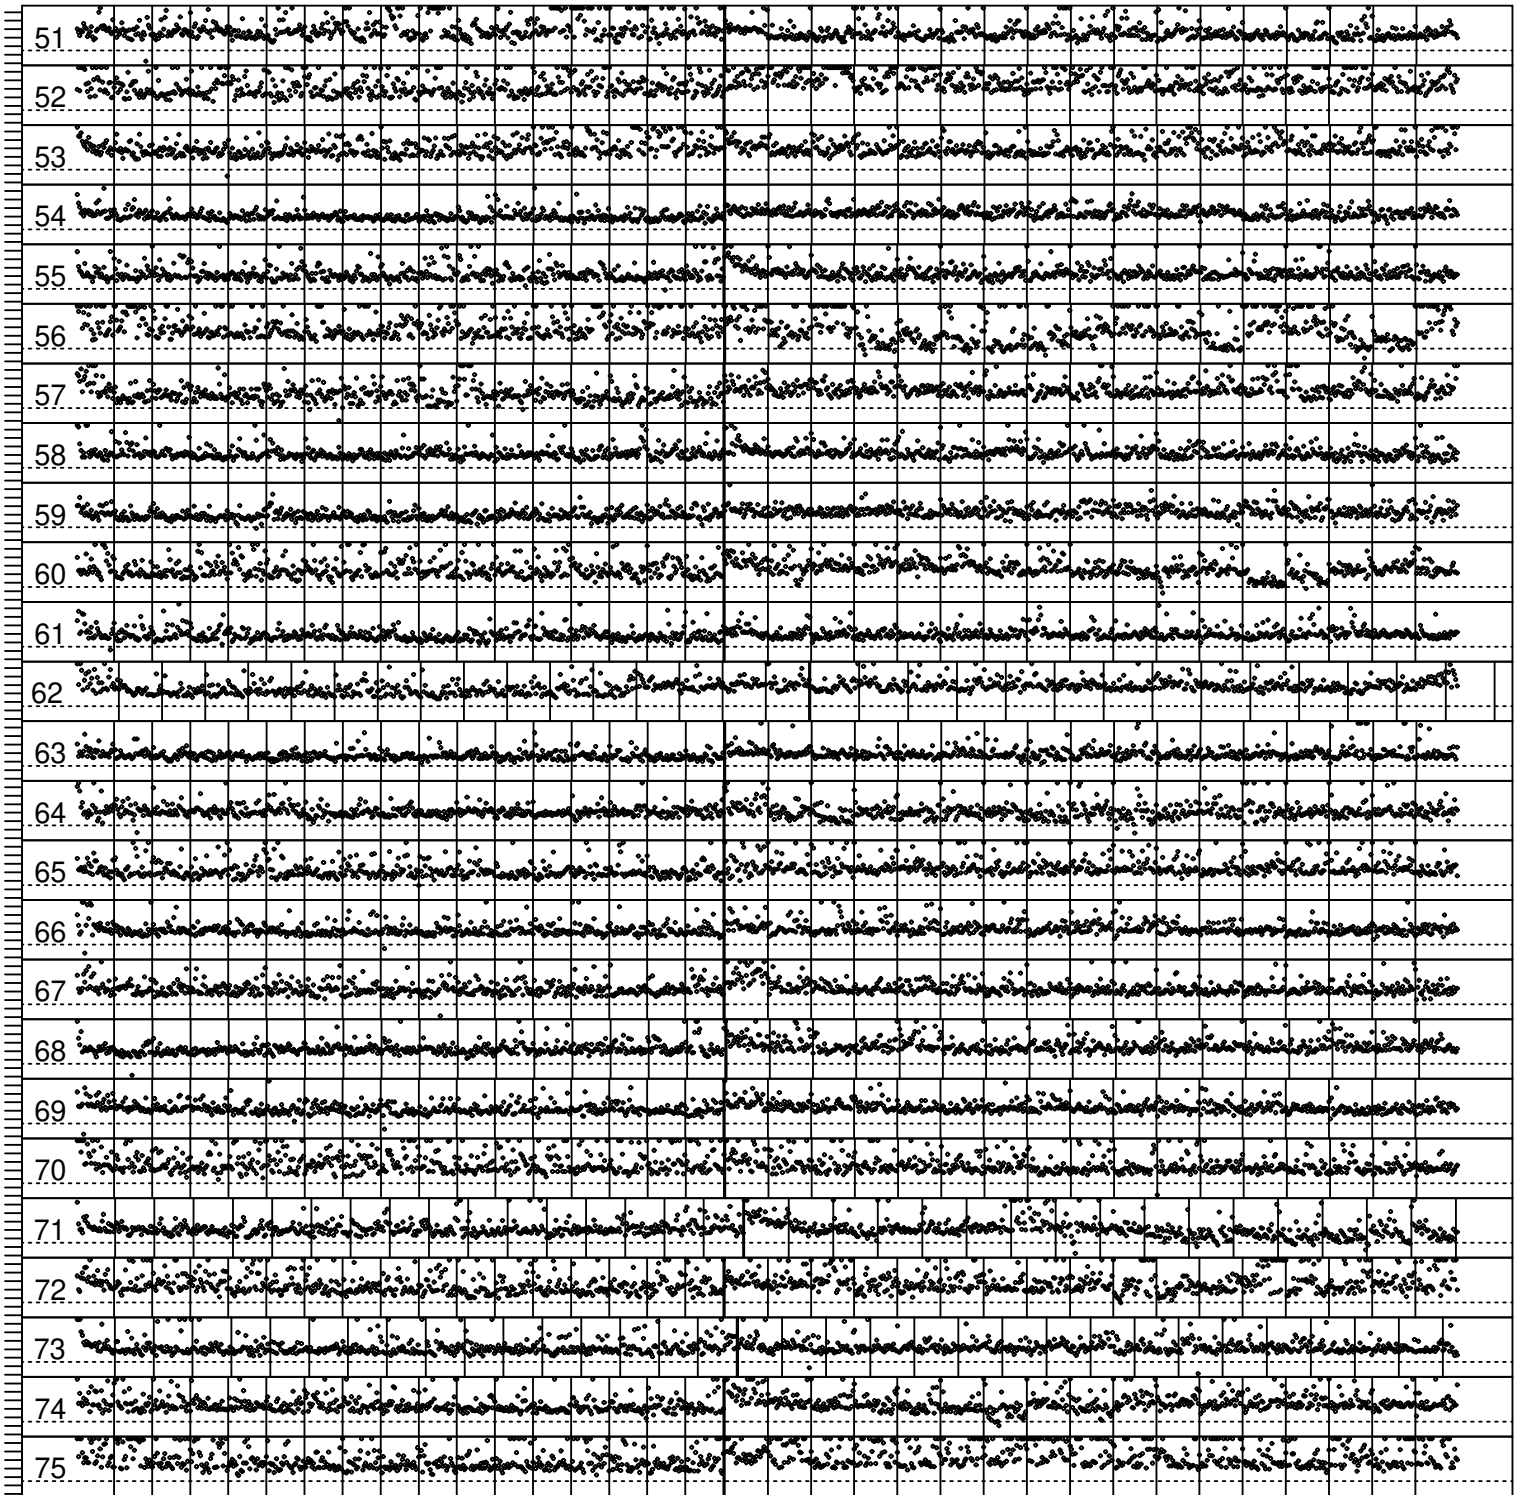

A time series plot of all RTs for all subjects in Experiment 1

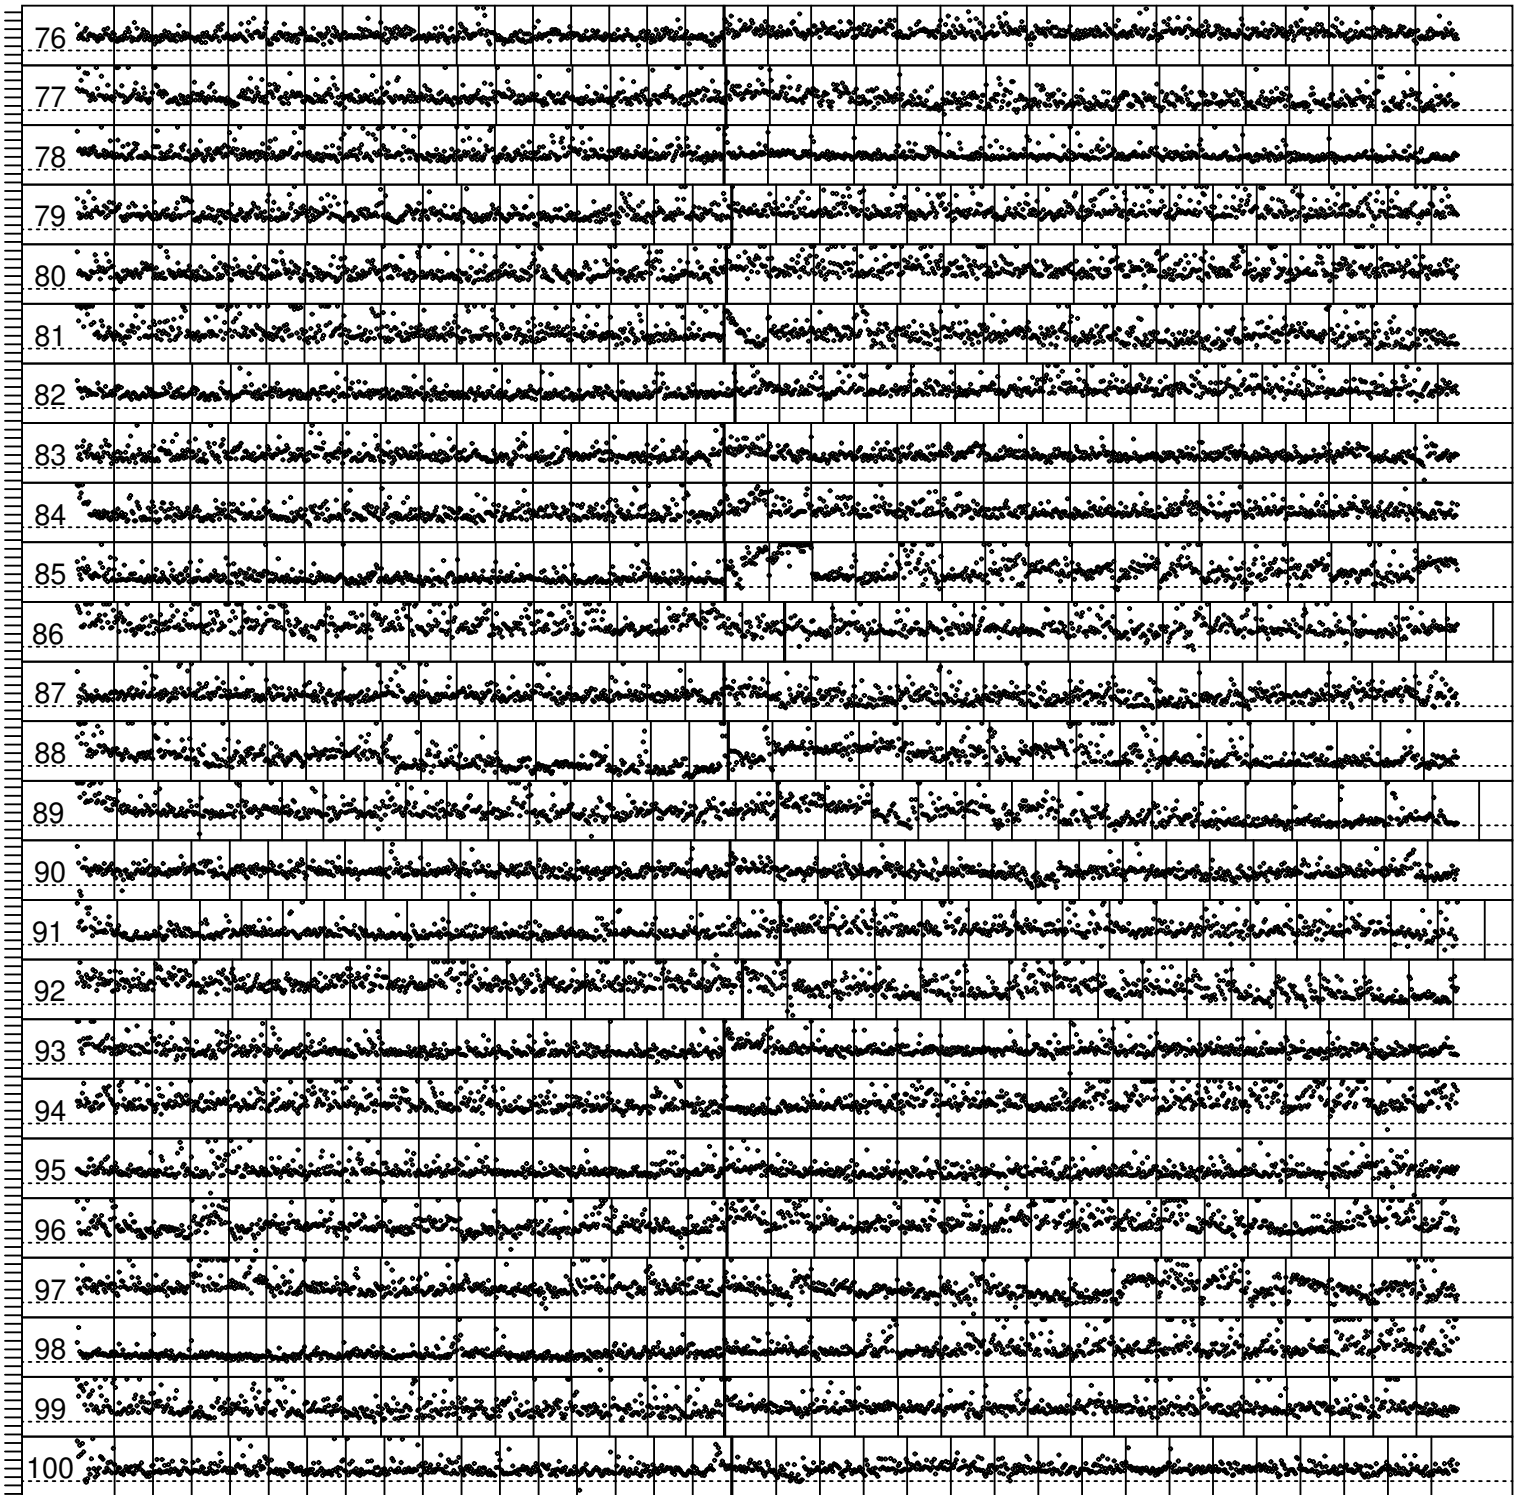



A time series plot of all RTs for all subjects in Experiment 1

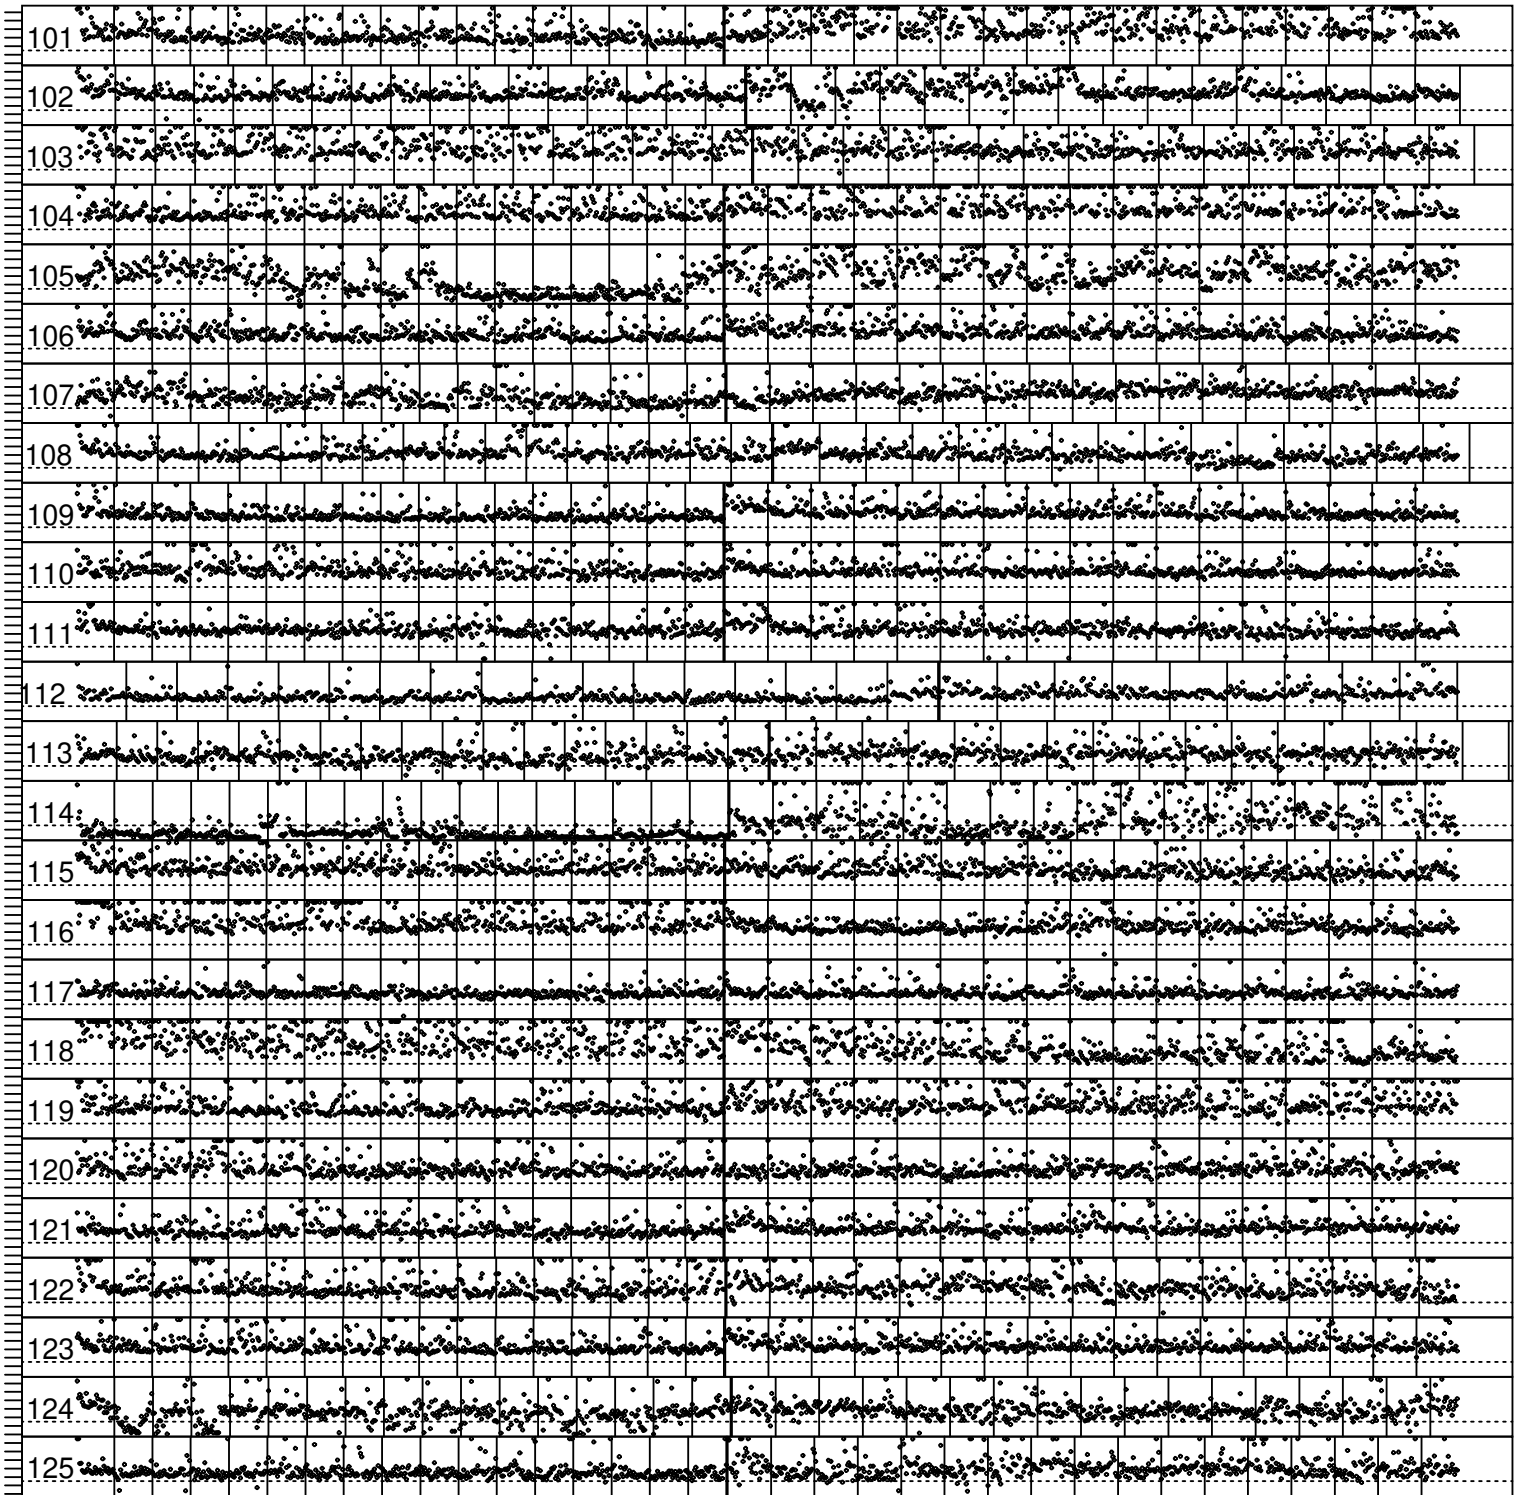

A time series plot of all RTs for all subjects in Experiment 1

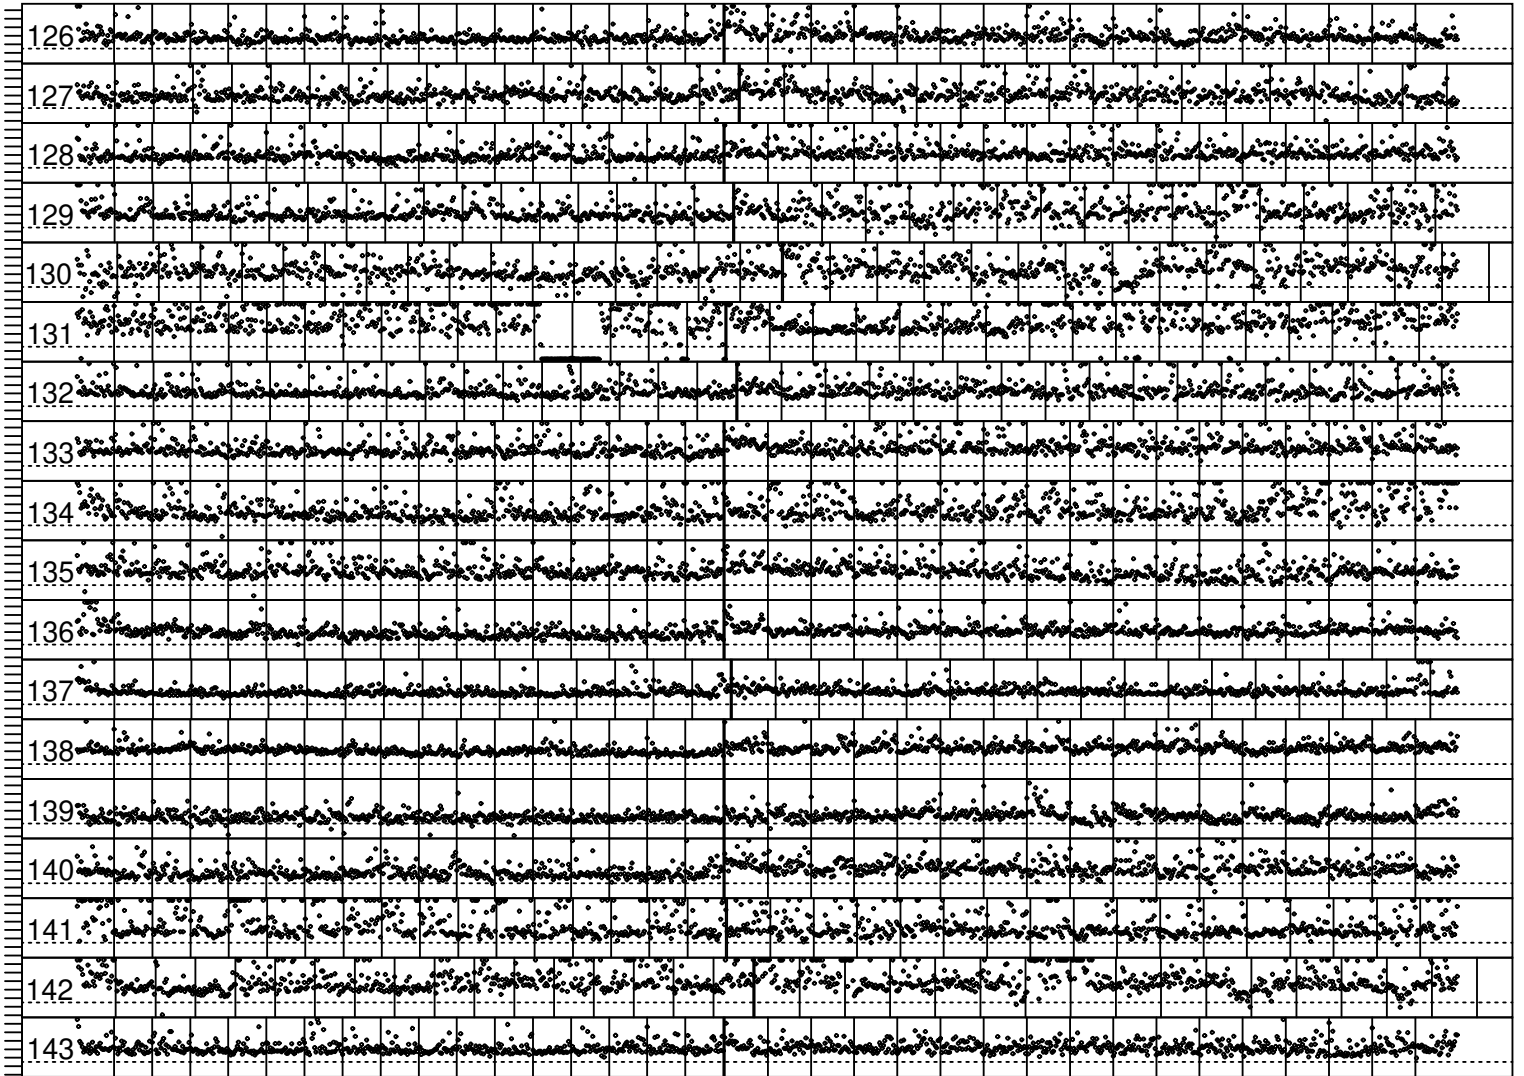

A time series plot of all RTs for all subjects in Experiment 2

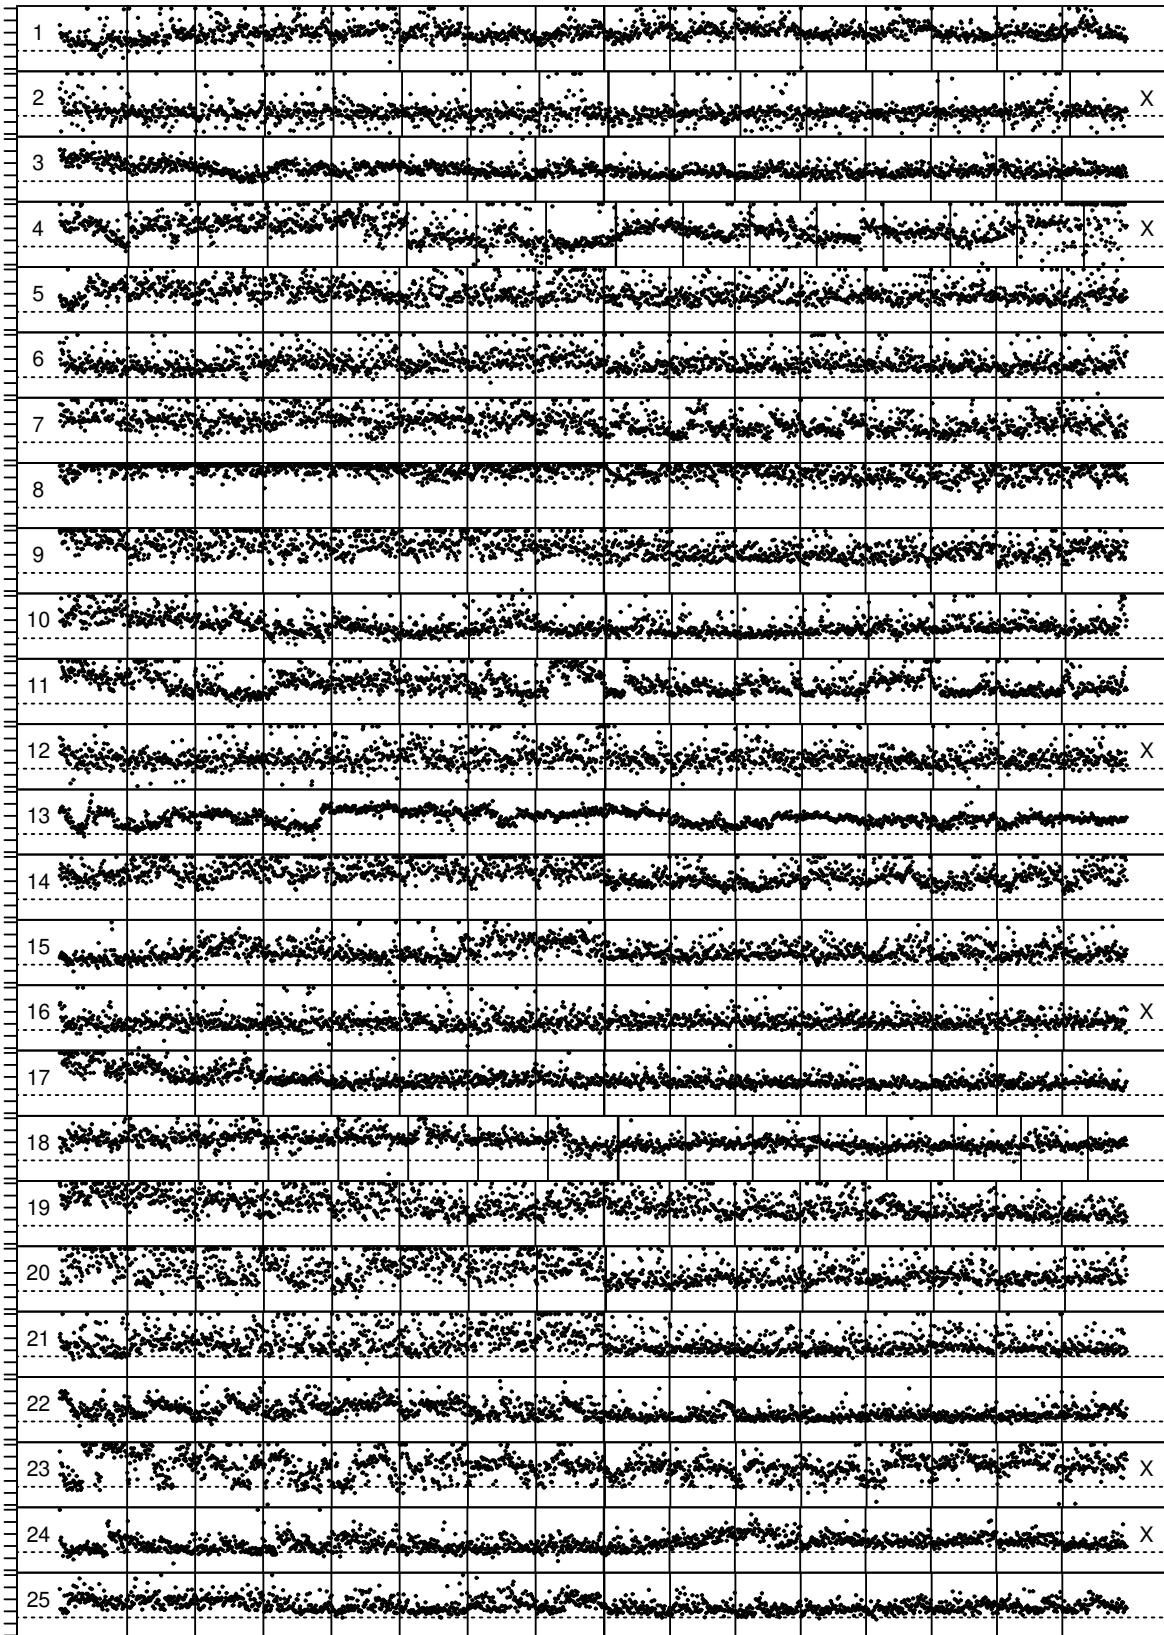

A time series plot of all RTs for all subjects in Experiment 2

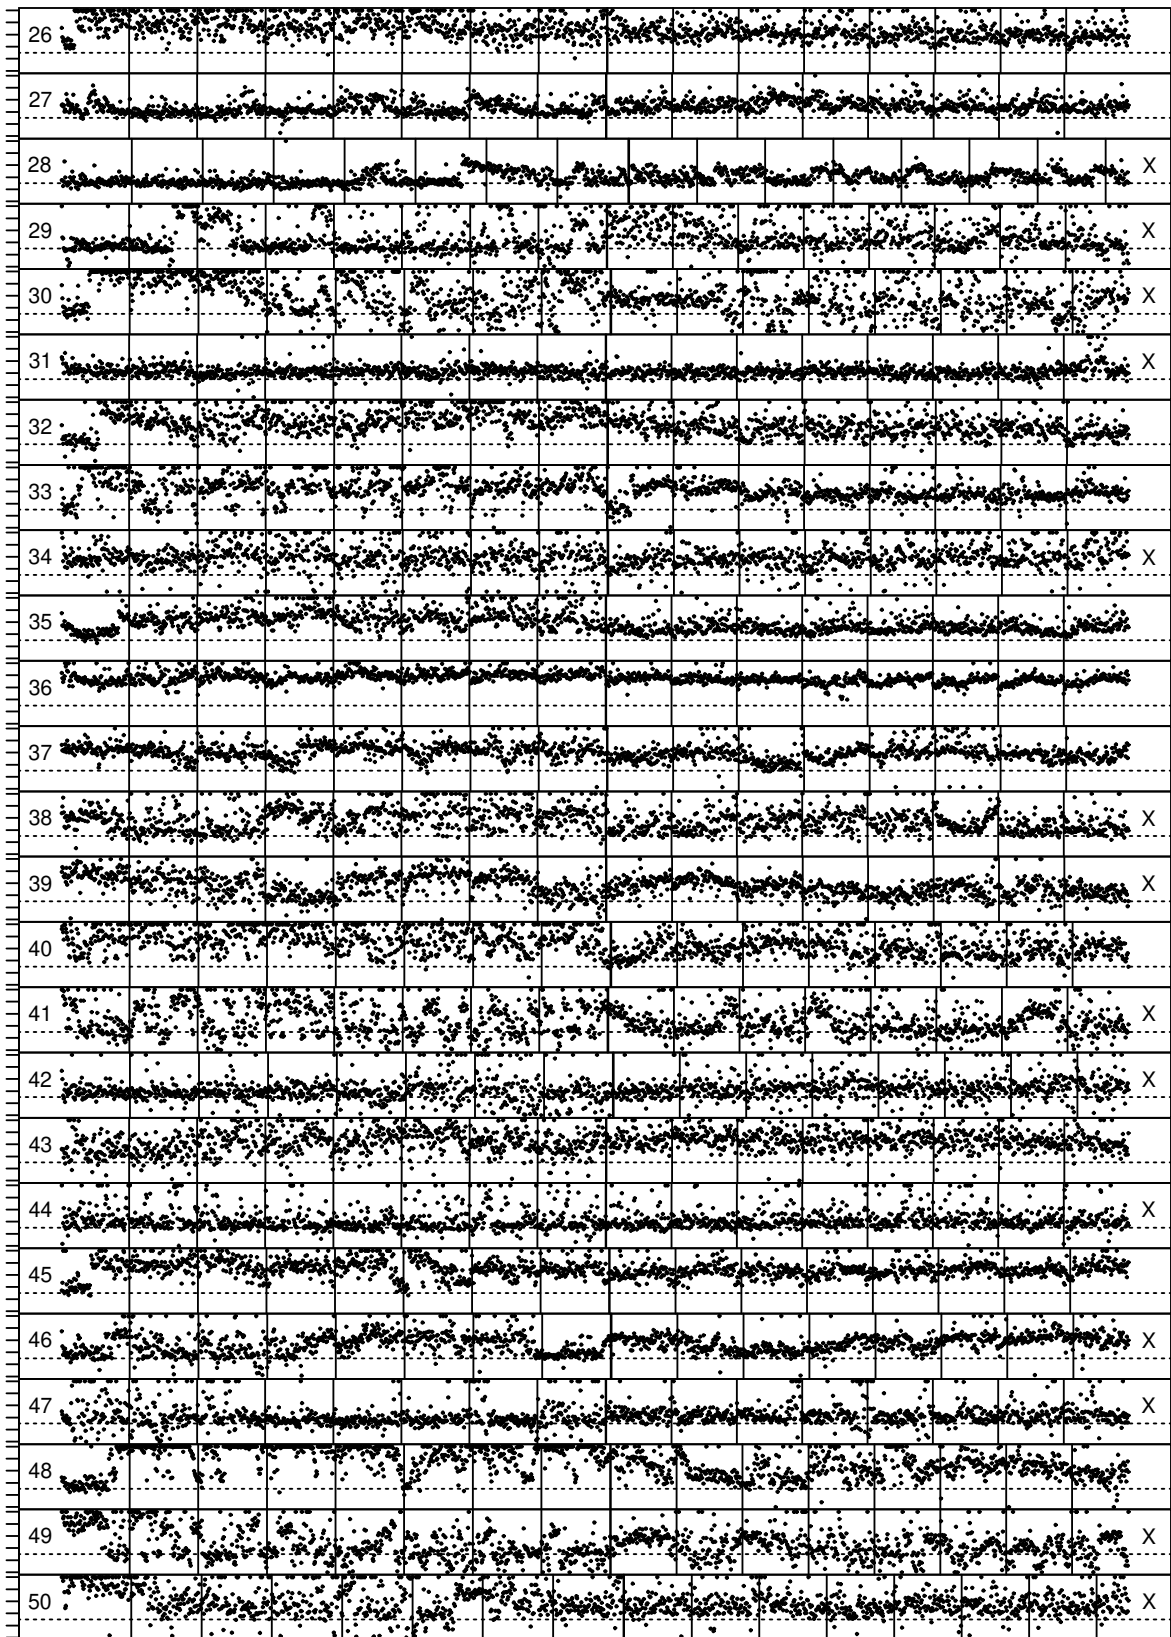

A time series plot of all RTs for all subjects in Experiment 2

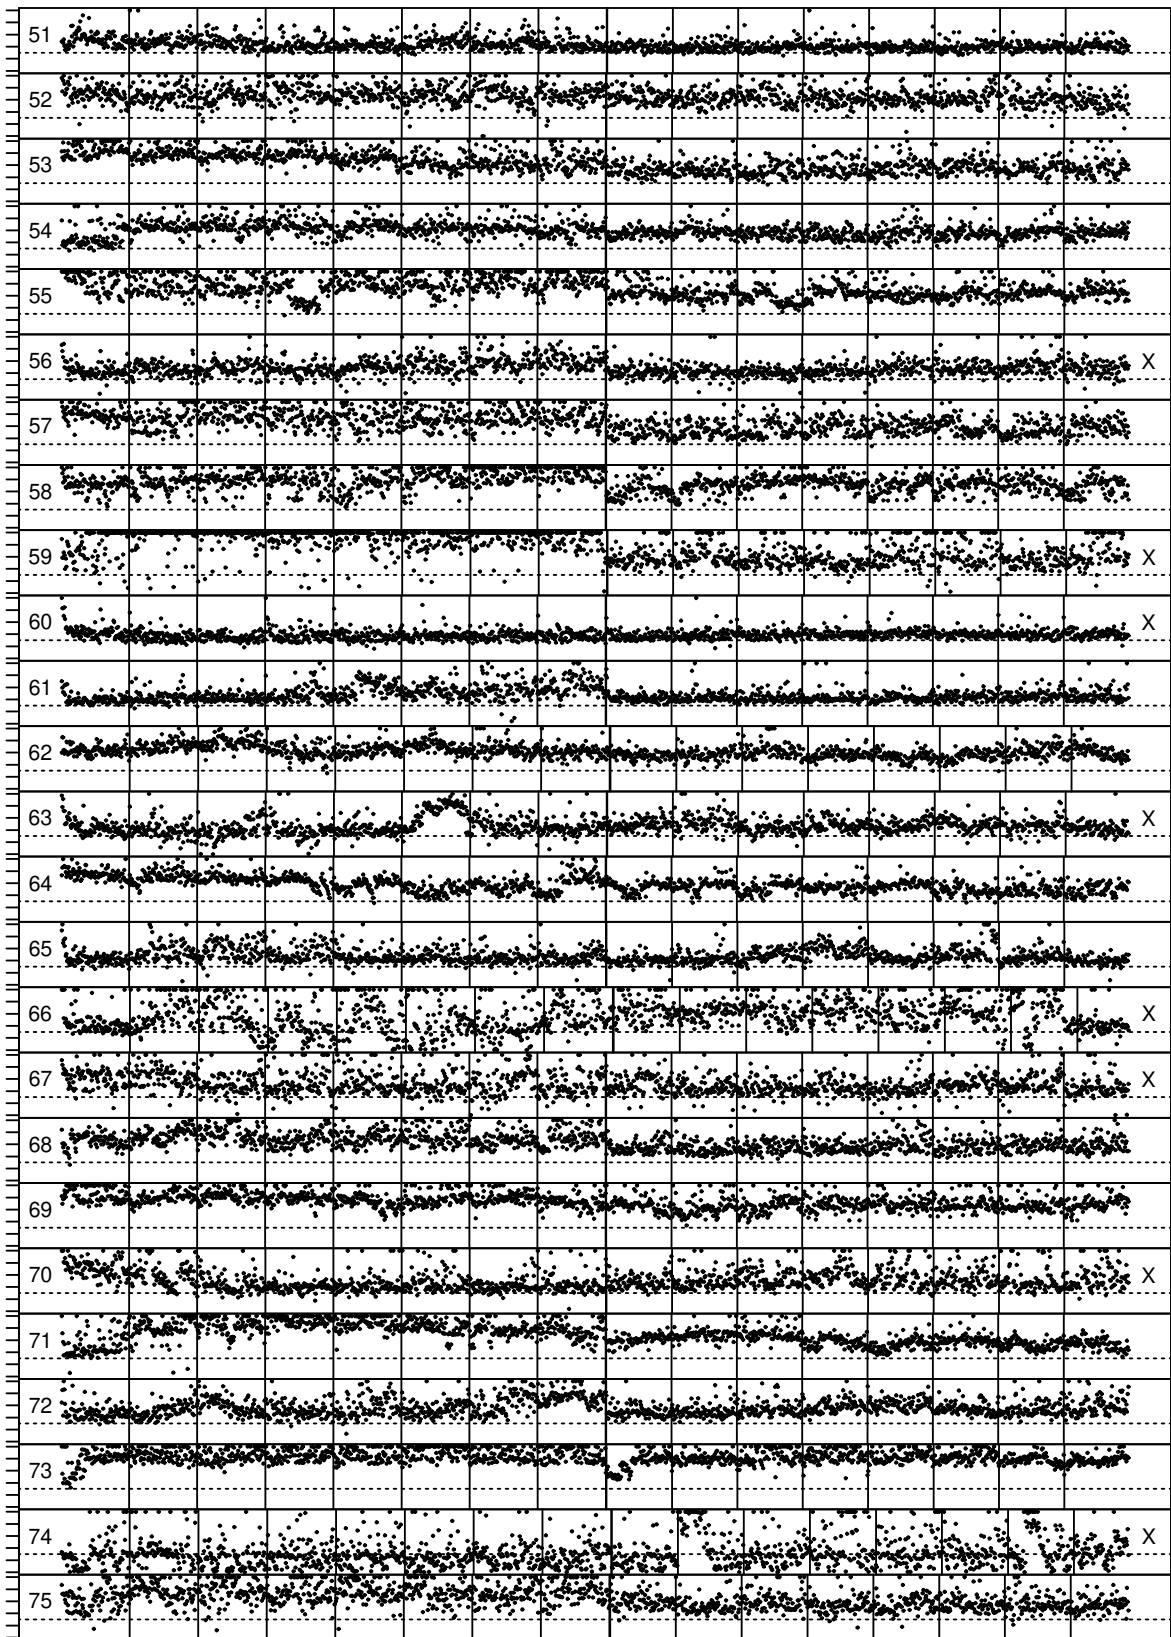

A time series plot of all RTs for all subjects in Experiment 2

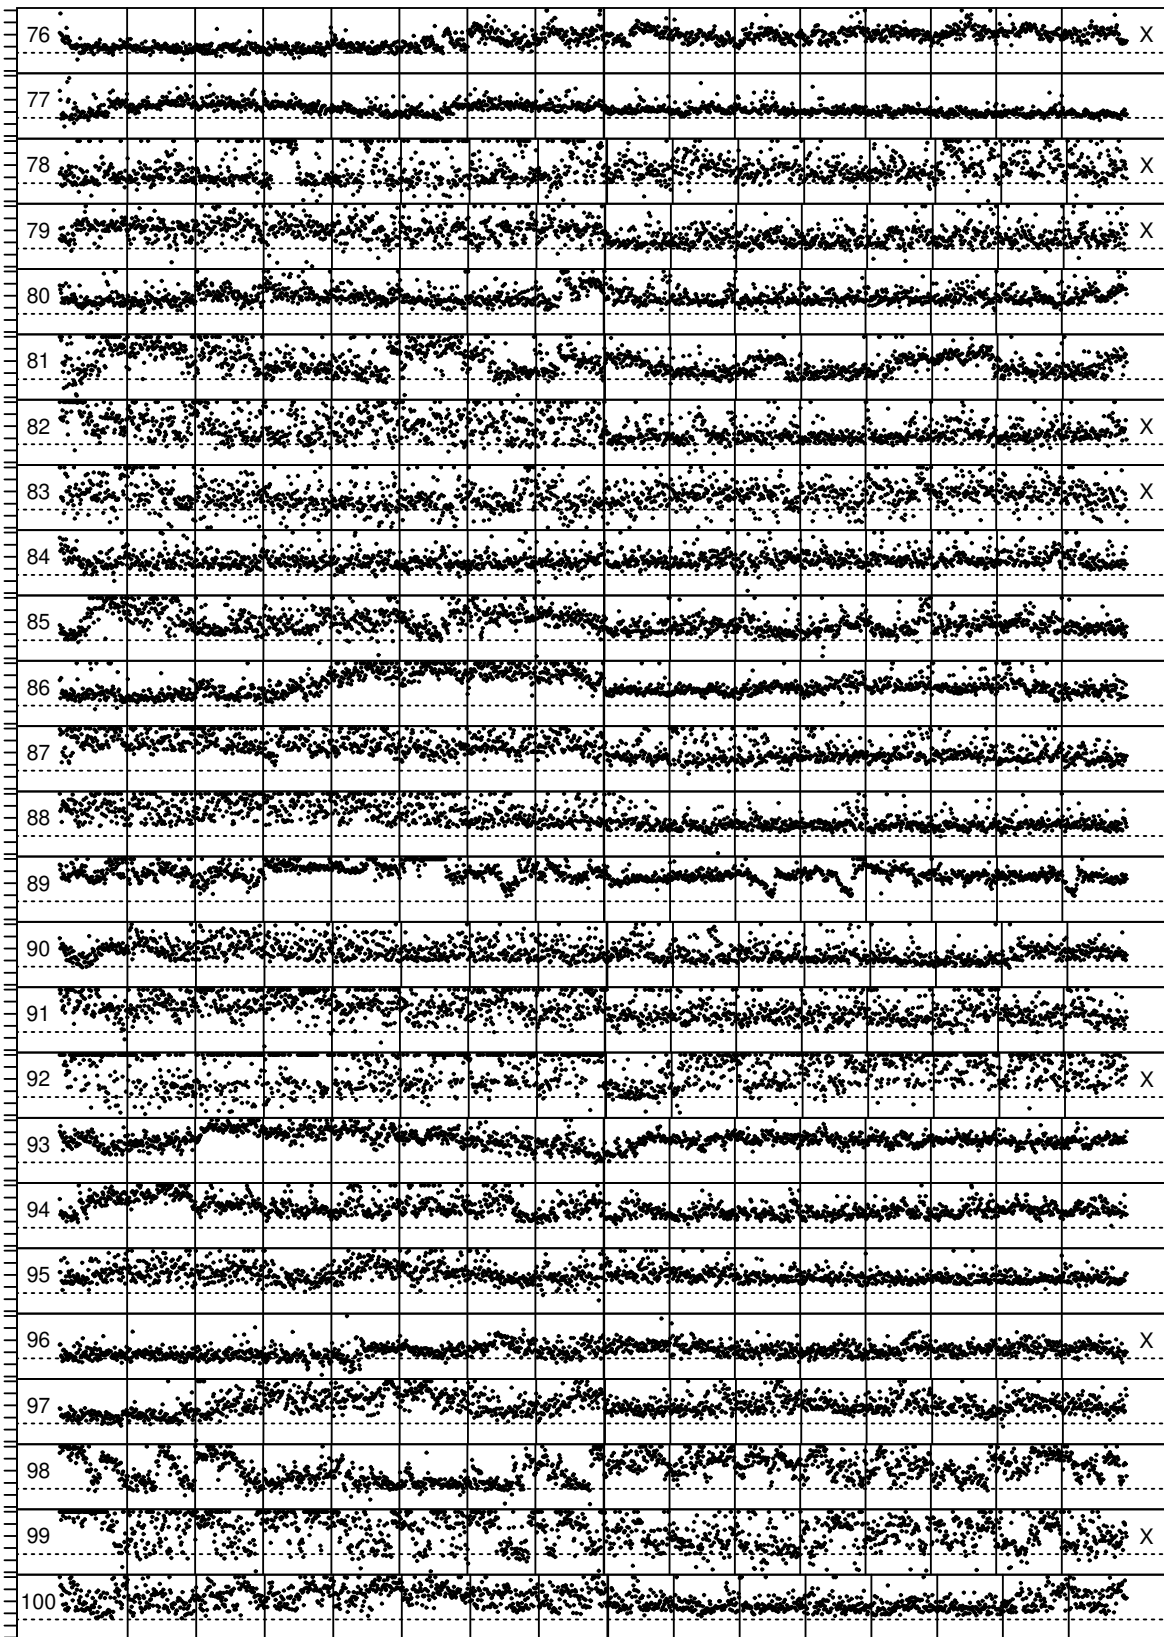

A time series plot of all RTs for all subjects in Experiment 2

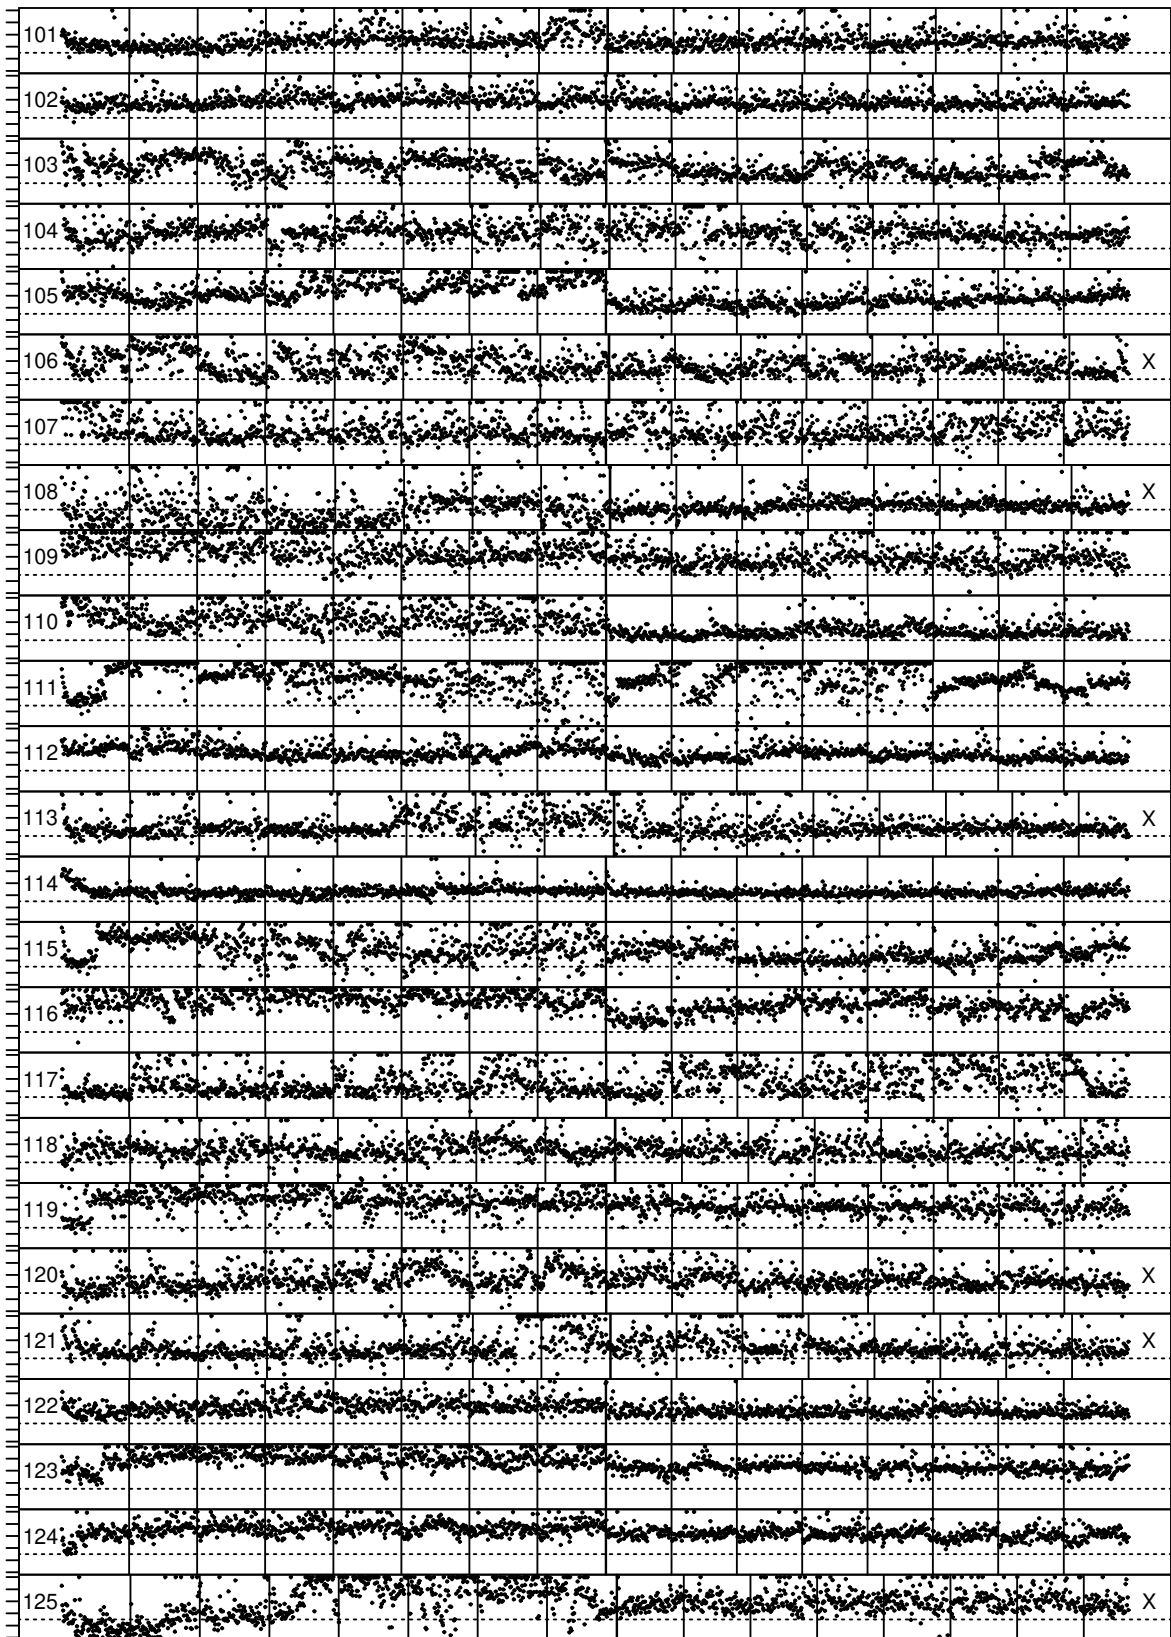



A time series plot of all RTs for all subjects in Experiment 2

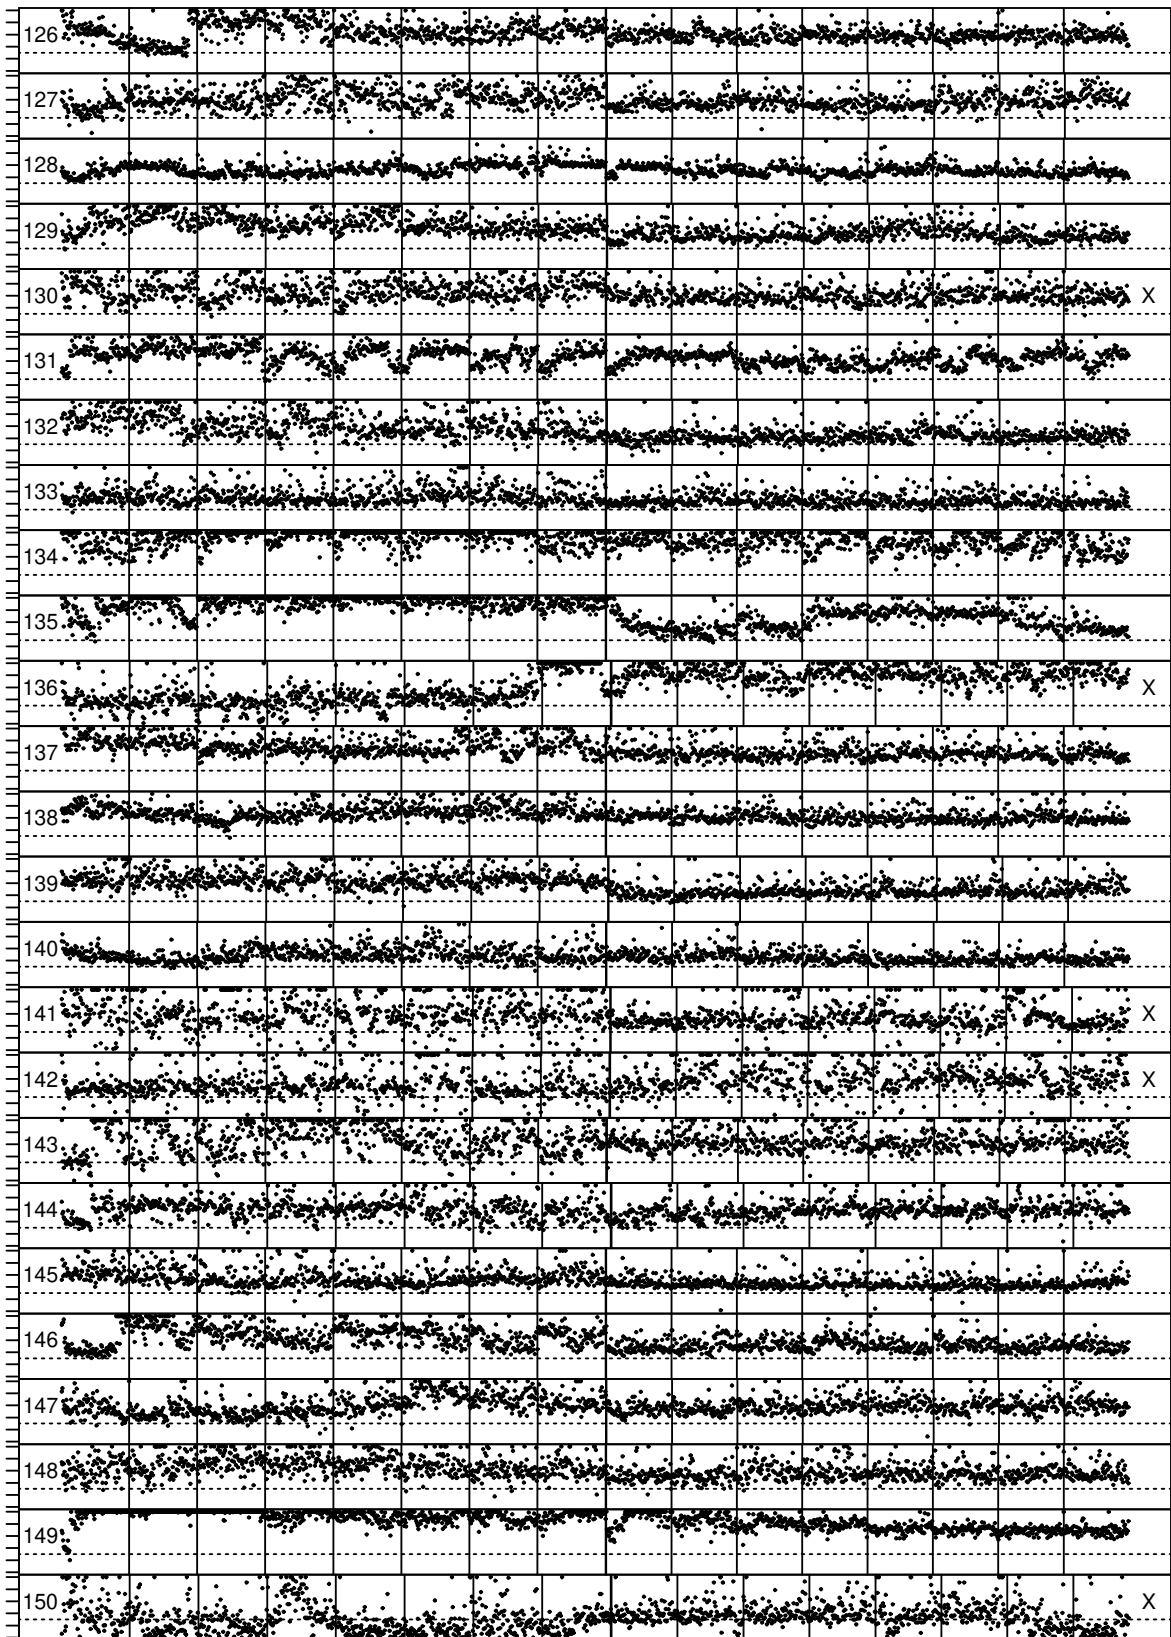

A time series plot of all RTs for all subjects in Experiment 2

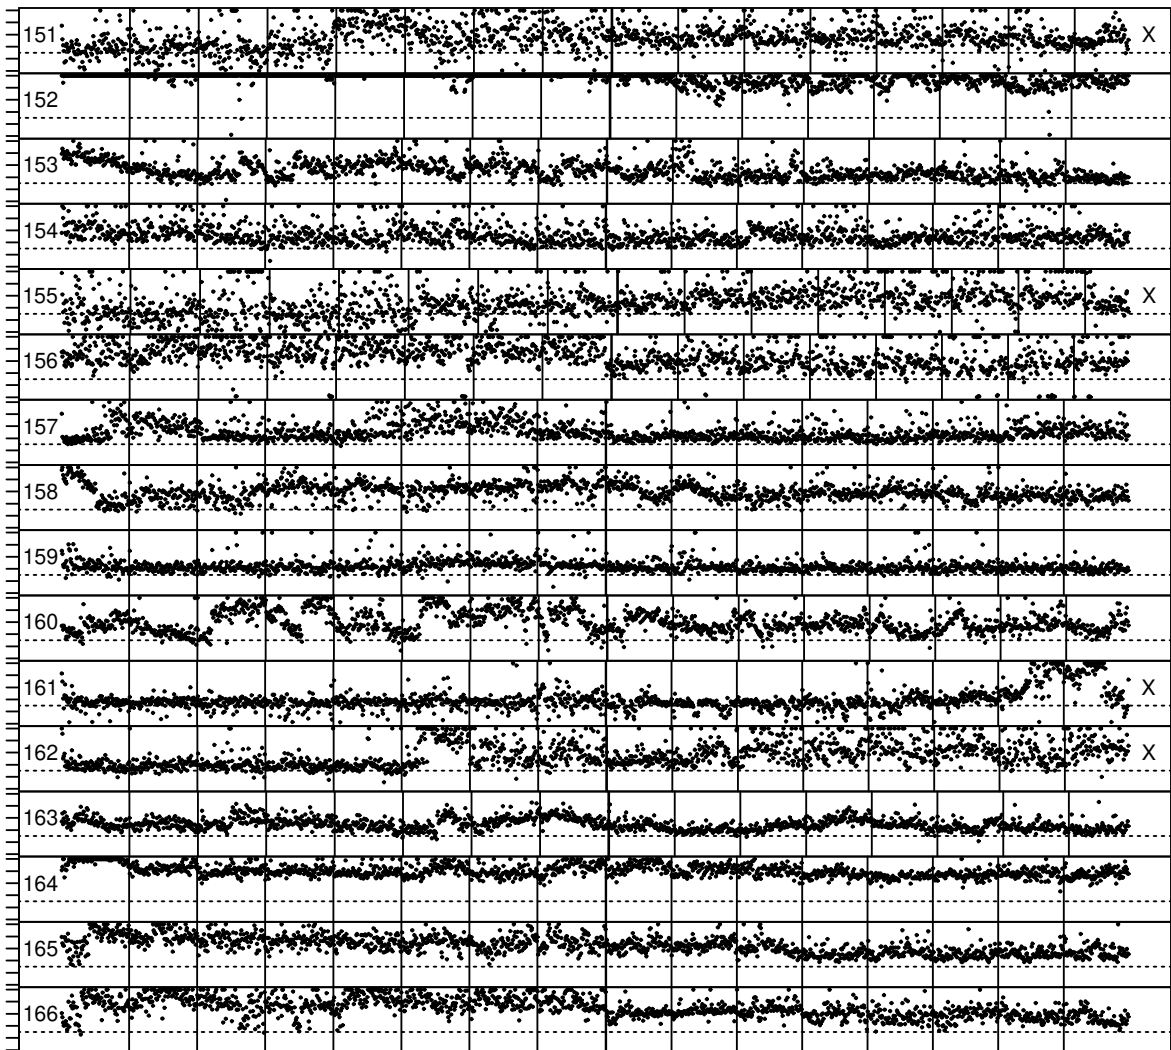

A time series plot of all RTs for all subjects (order, young, old, very old)  
for lexical decision in Ratcliff, Thapar, & McKoon (2010)

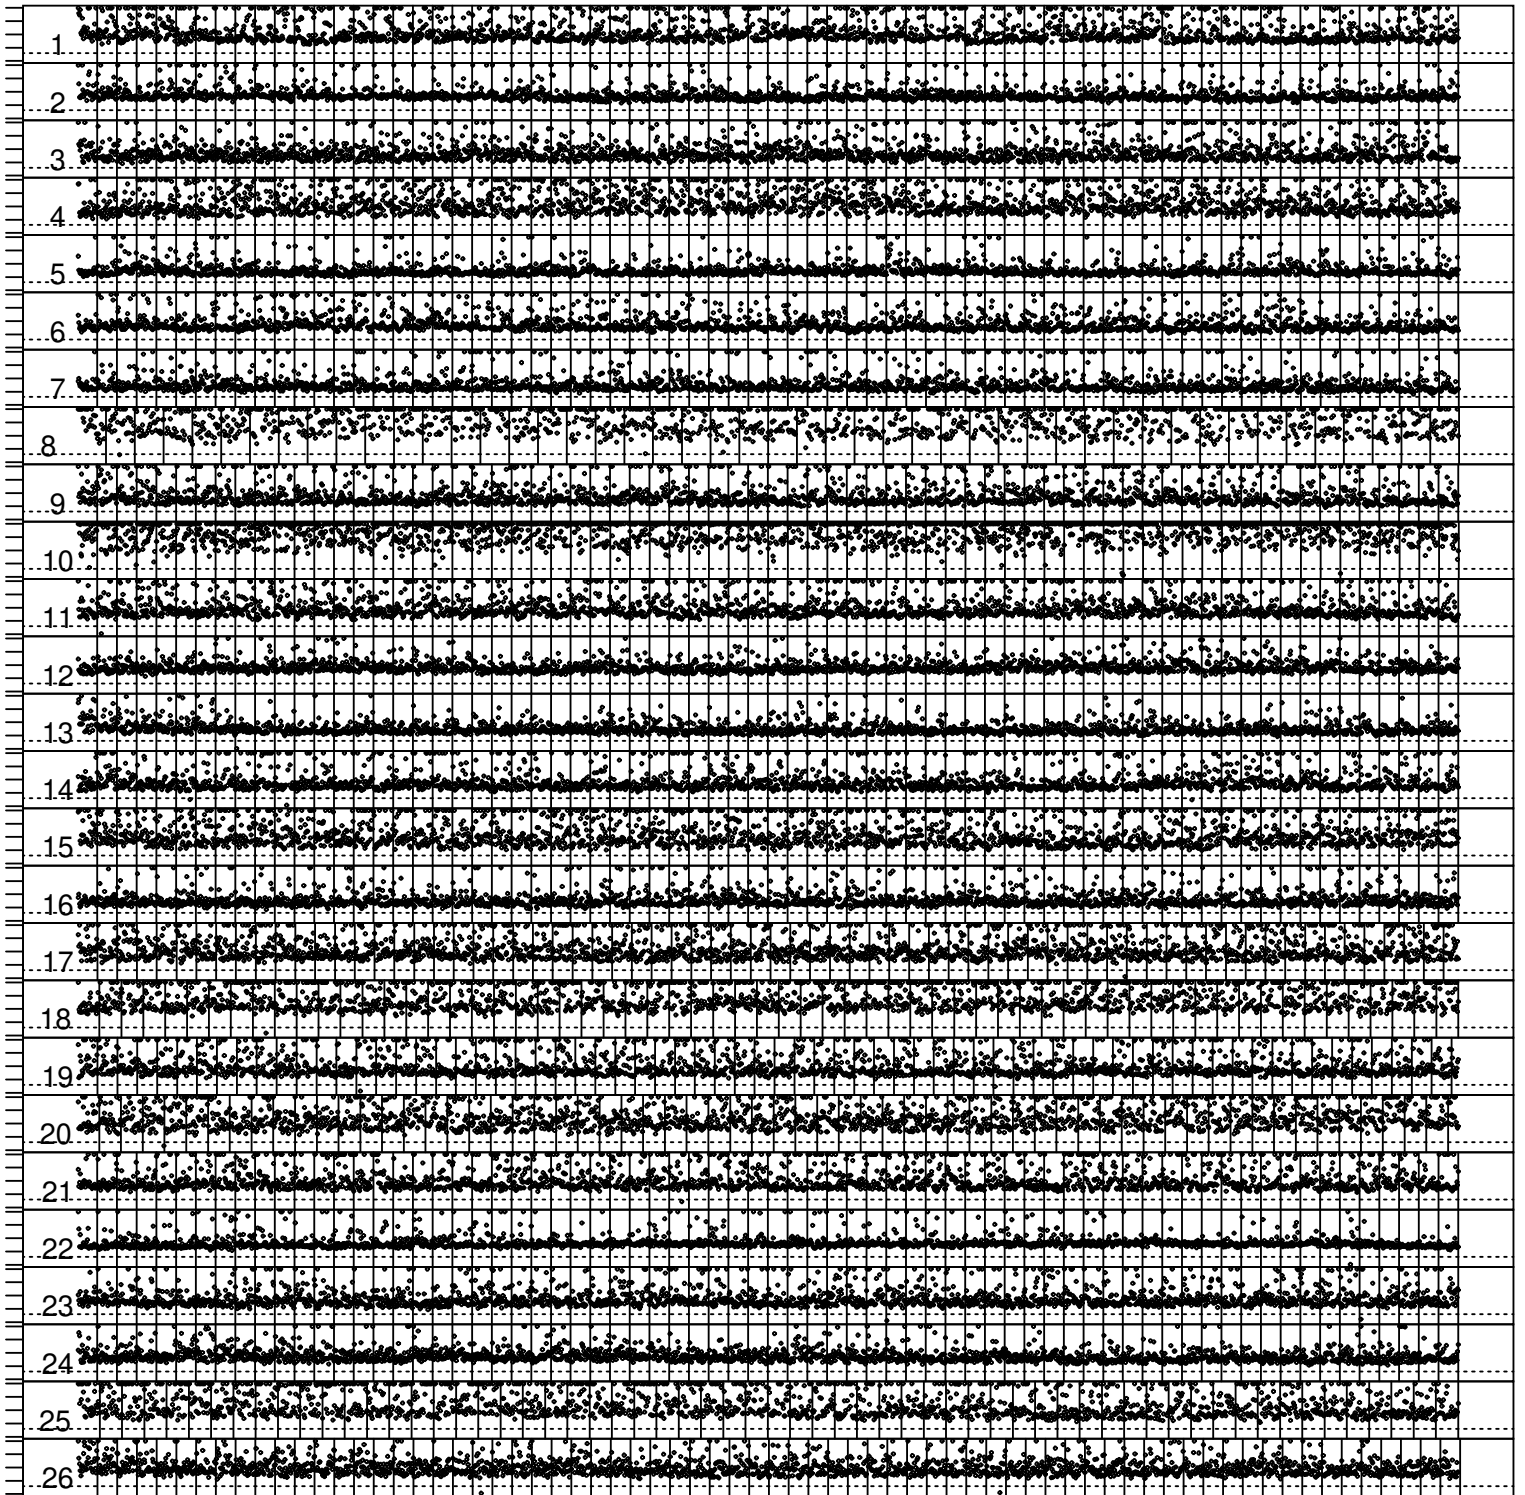

A time series plot of all RTs for all subjects (order, young, old, very old)  
for lexical decision in Ratcliff, Thapar, & McKoon (2010)

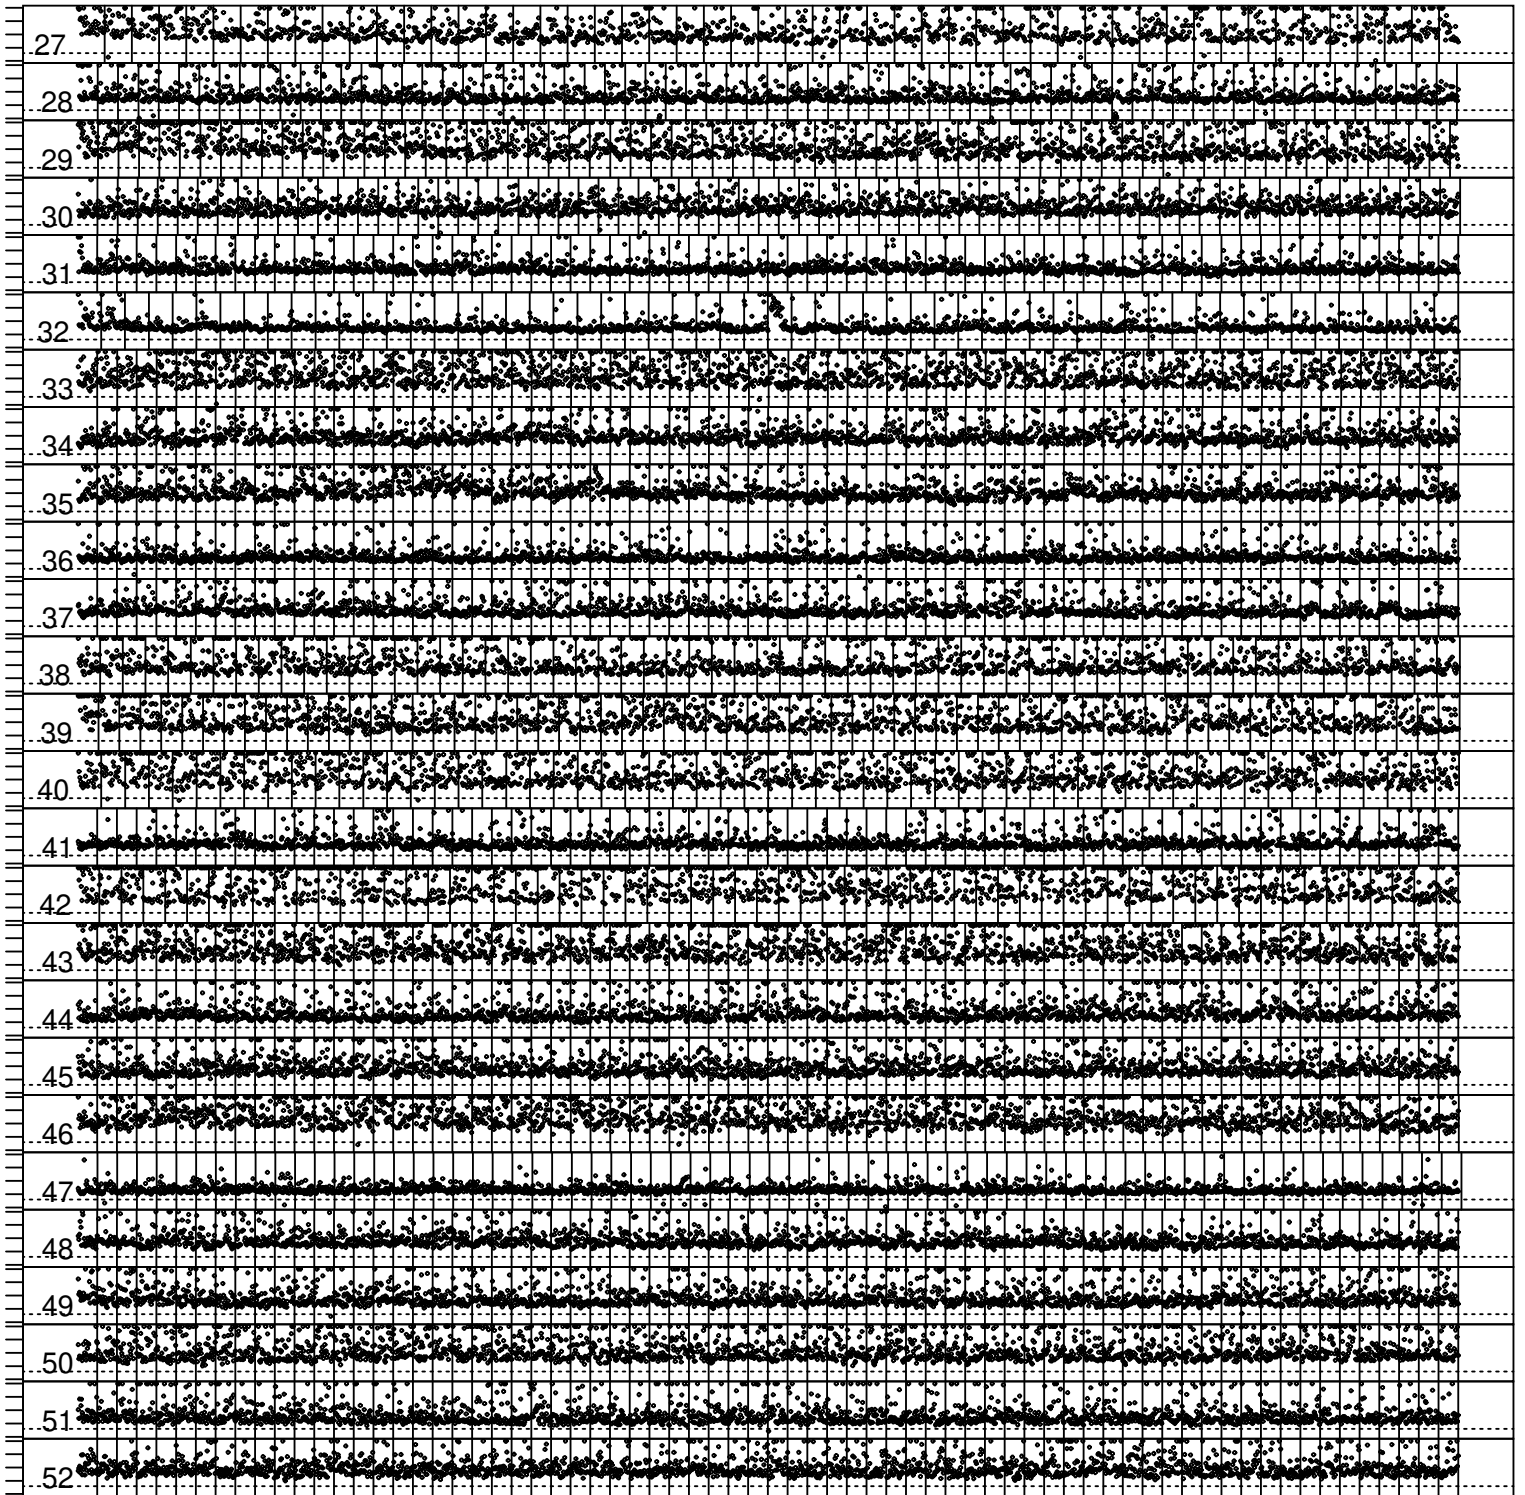

A time series plot of all RTs for all subjects (order, young, old, very old)  
for lexical decision in Ratcliff, Thapar, & McKoon (2010)

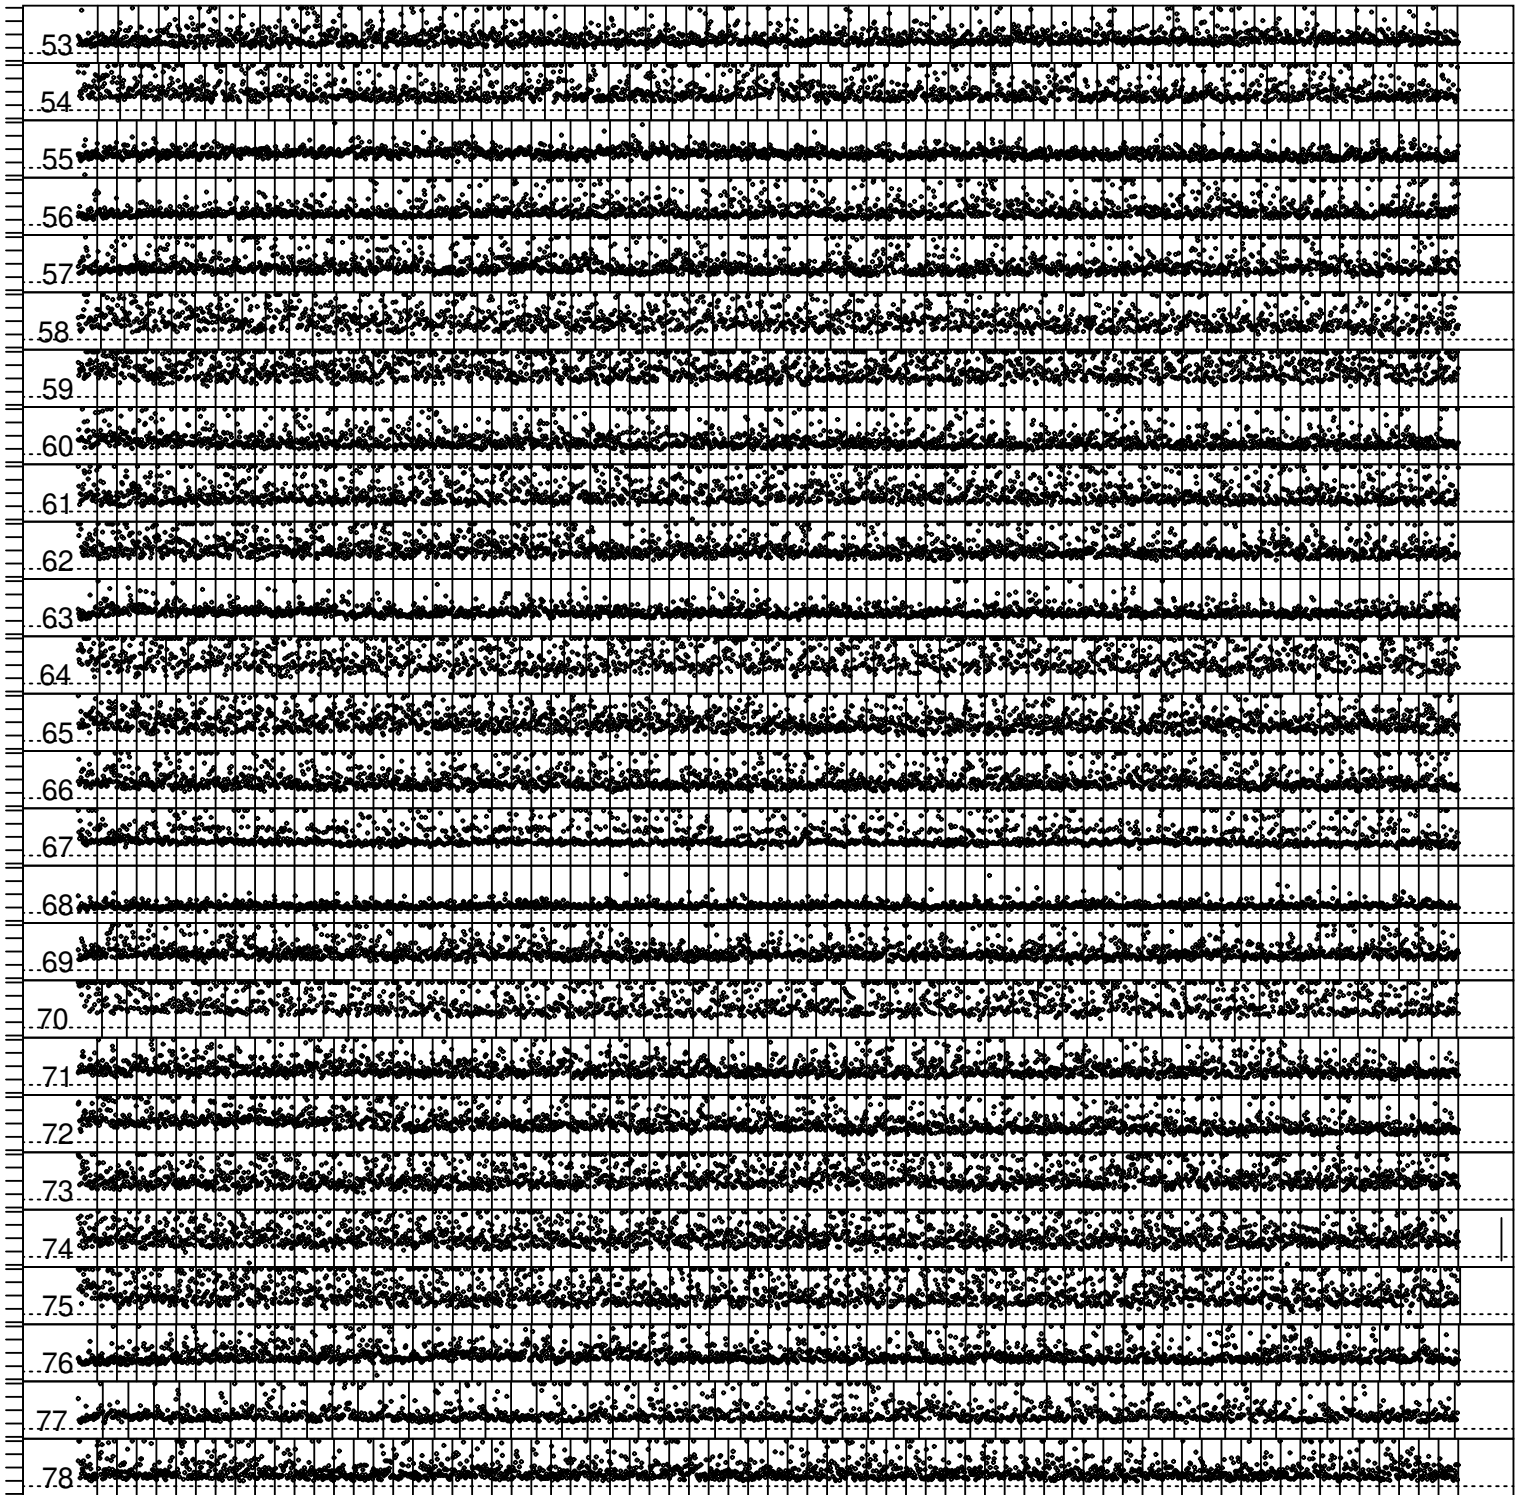

A time series plot of all RTs for all subjects (order, young, old, very old)  
for lexical decision in Ratcliff, Thapar, & McKoon (2010)

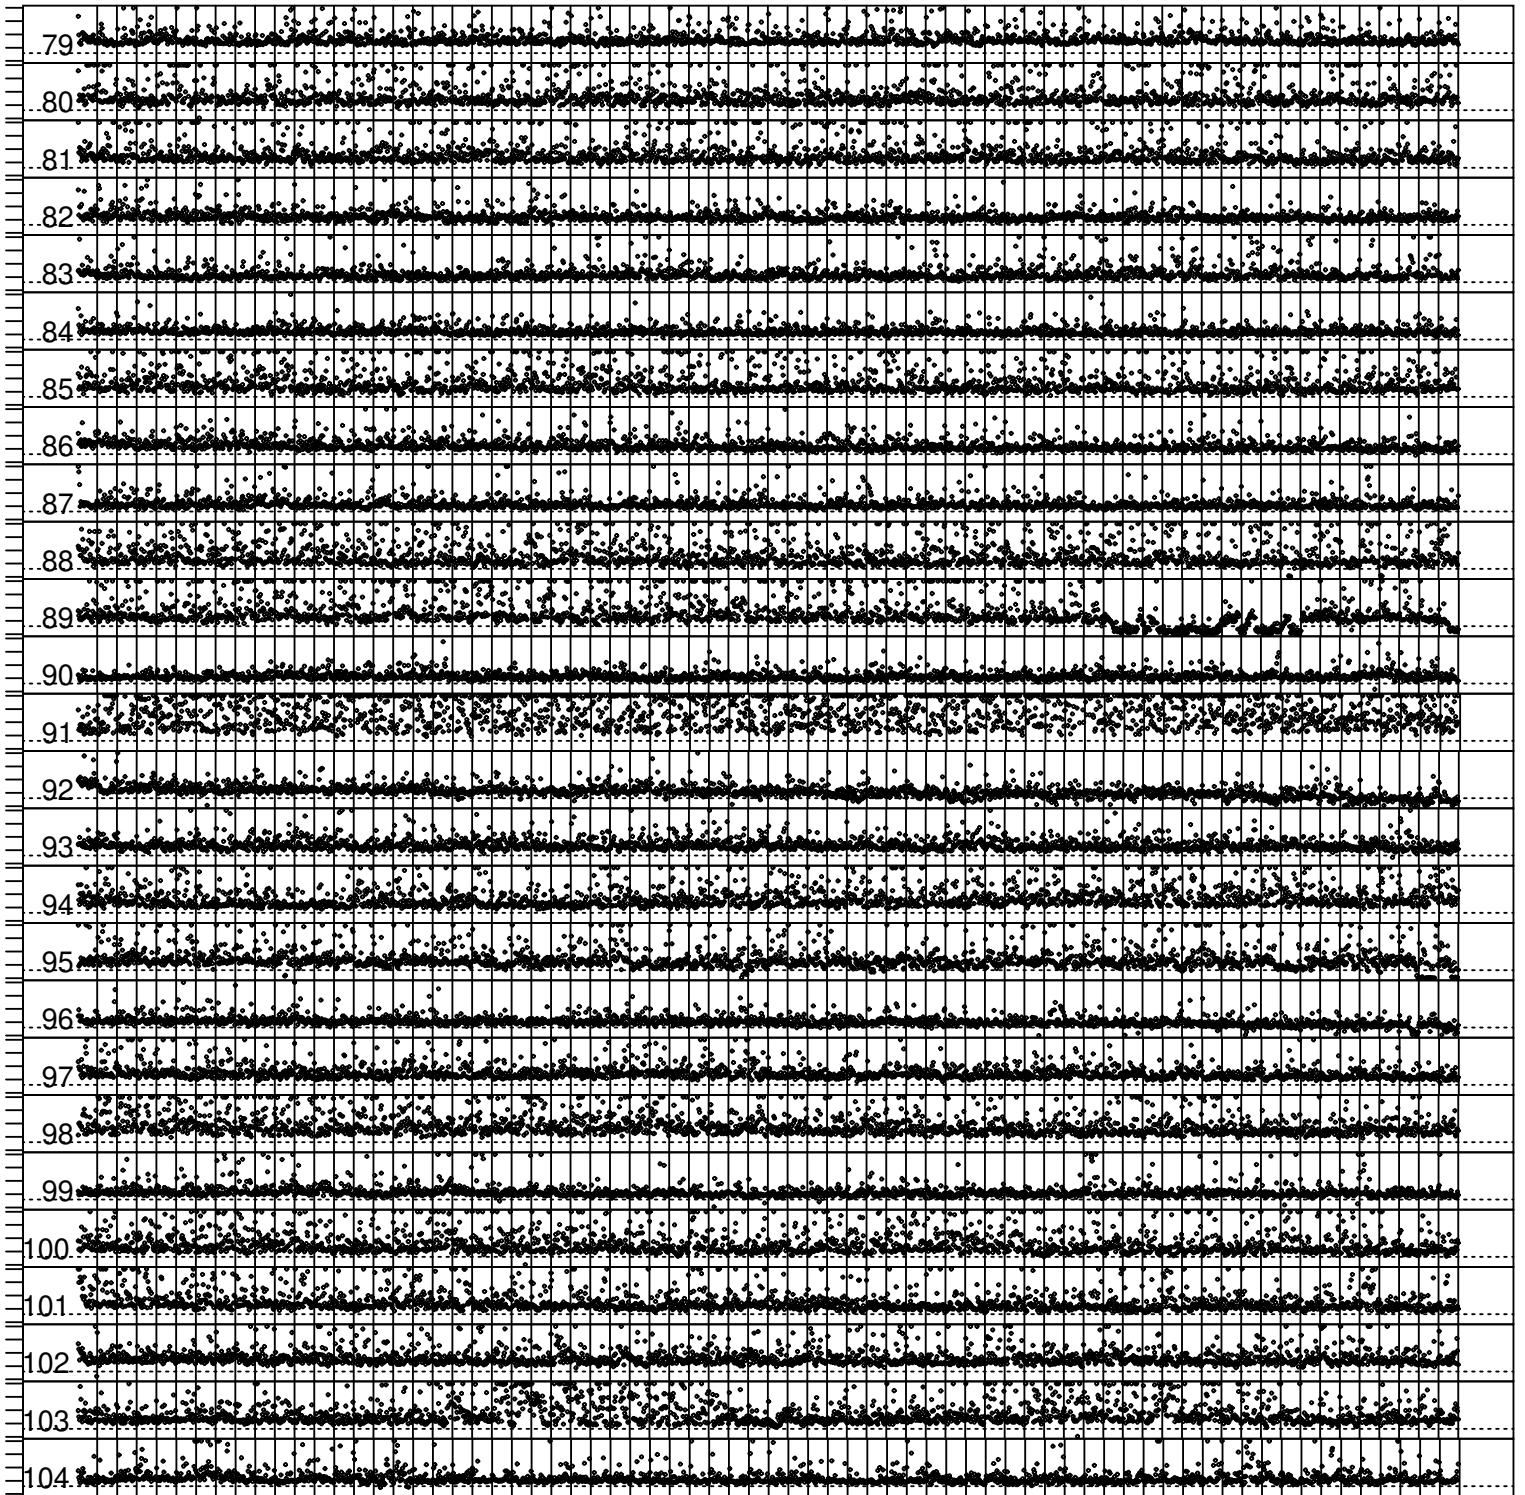



A time series plot of all RTs for all subjects (order, young, old, very old)  
for lexical decision in Ratcliff, Thapar, & McKoon (2010)

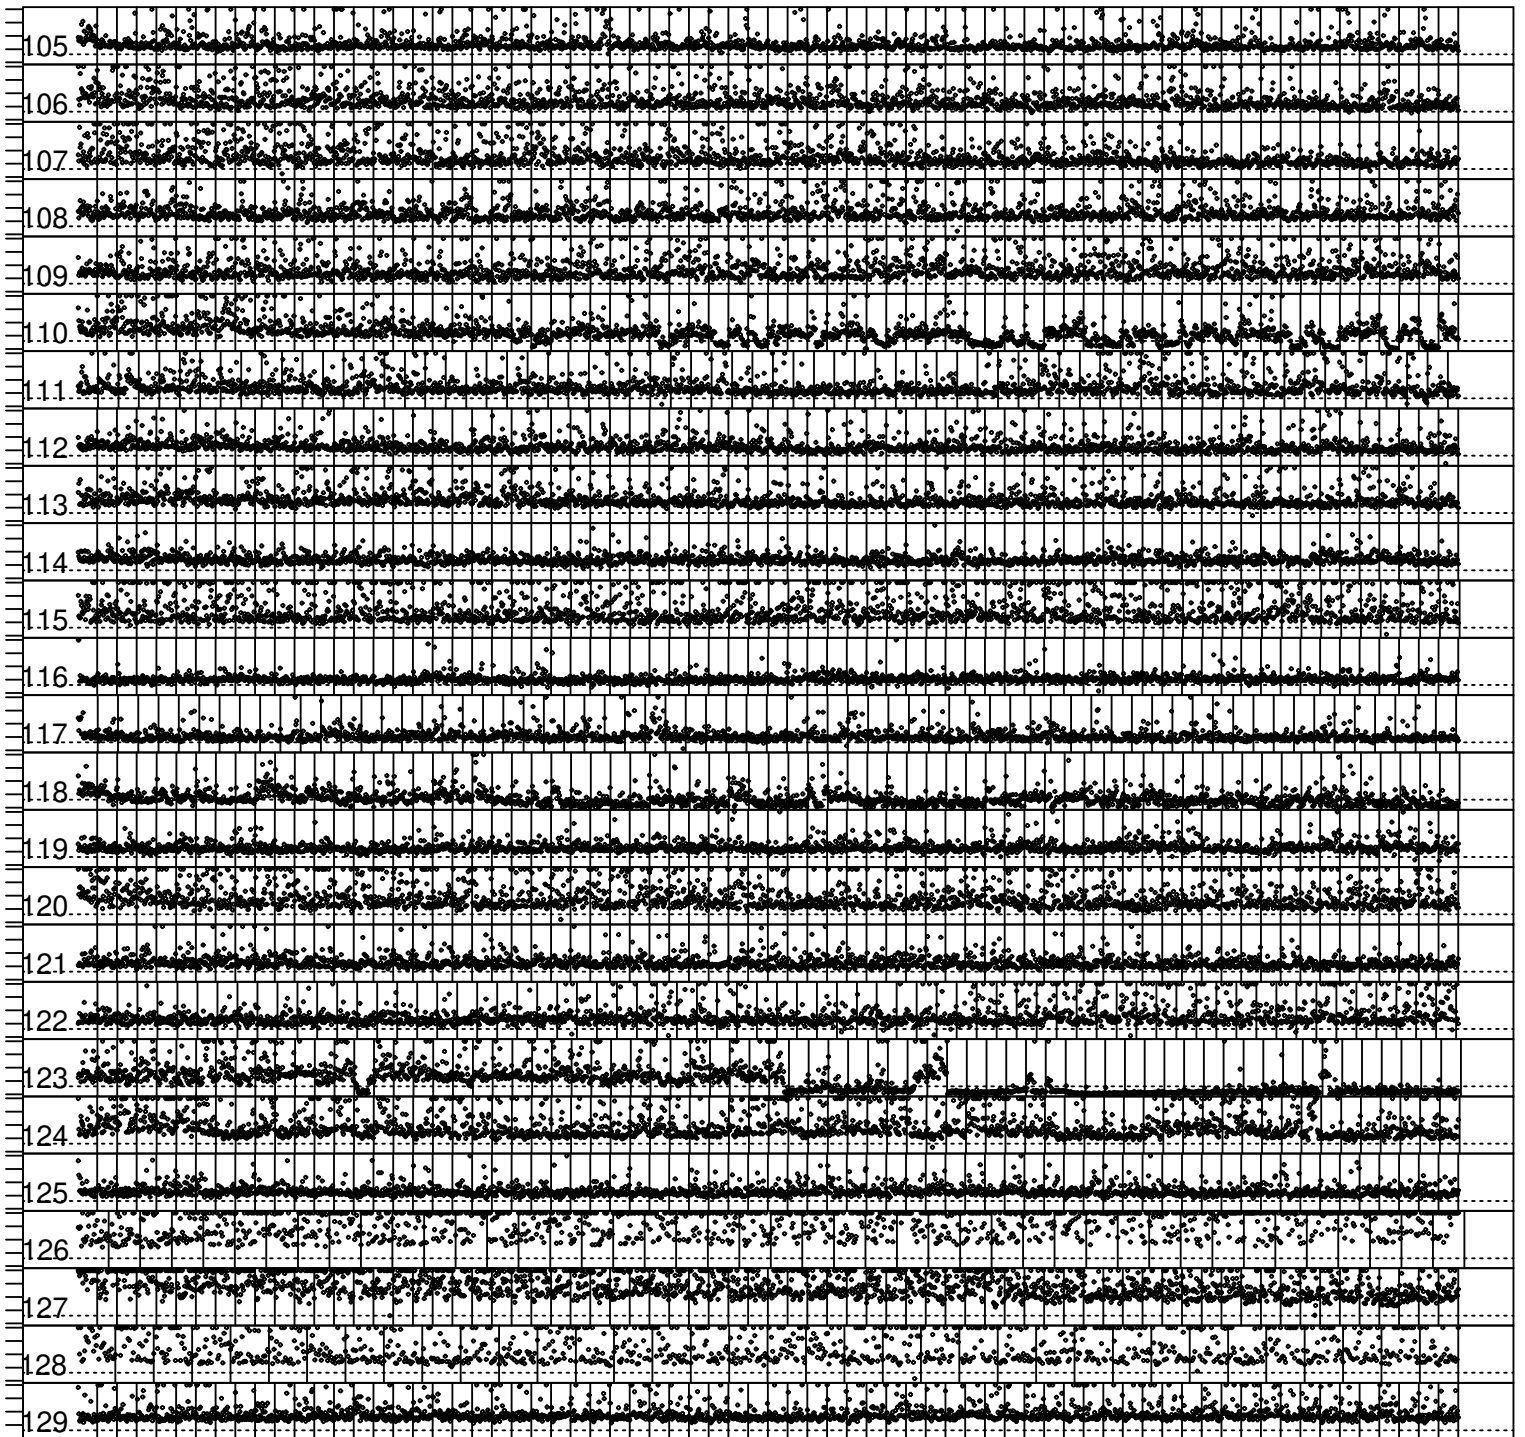



A time series plot of all RTs for all subjects (order, young, old, very old)  
for item recognition in Ratcliff, Thapar, & McKoon (2010)

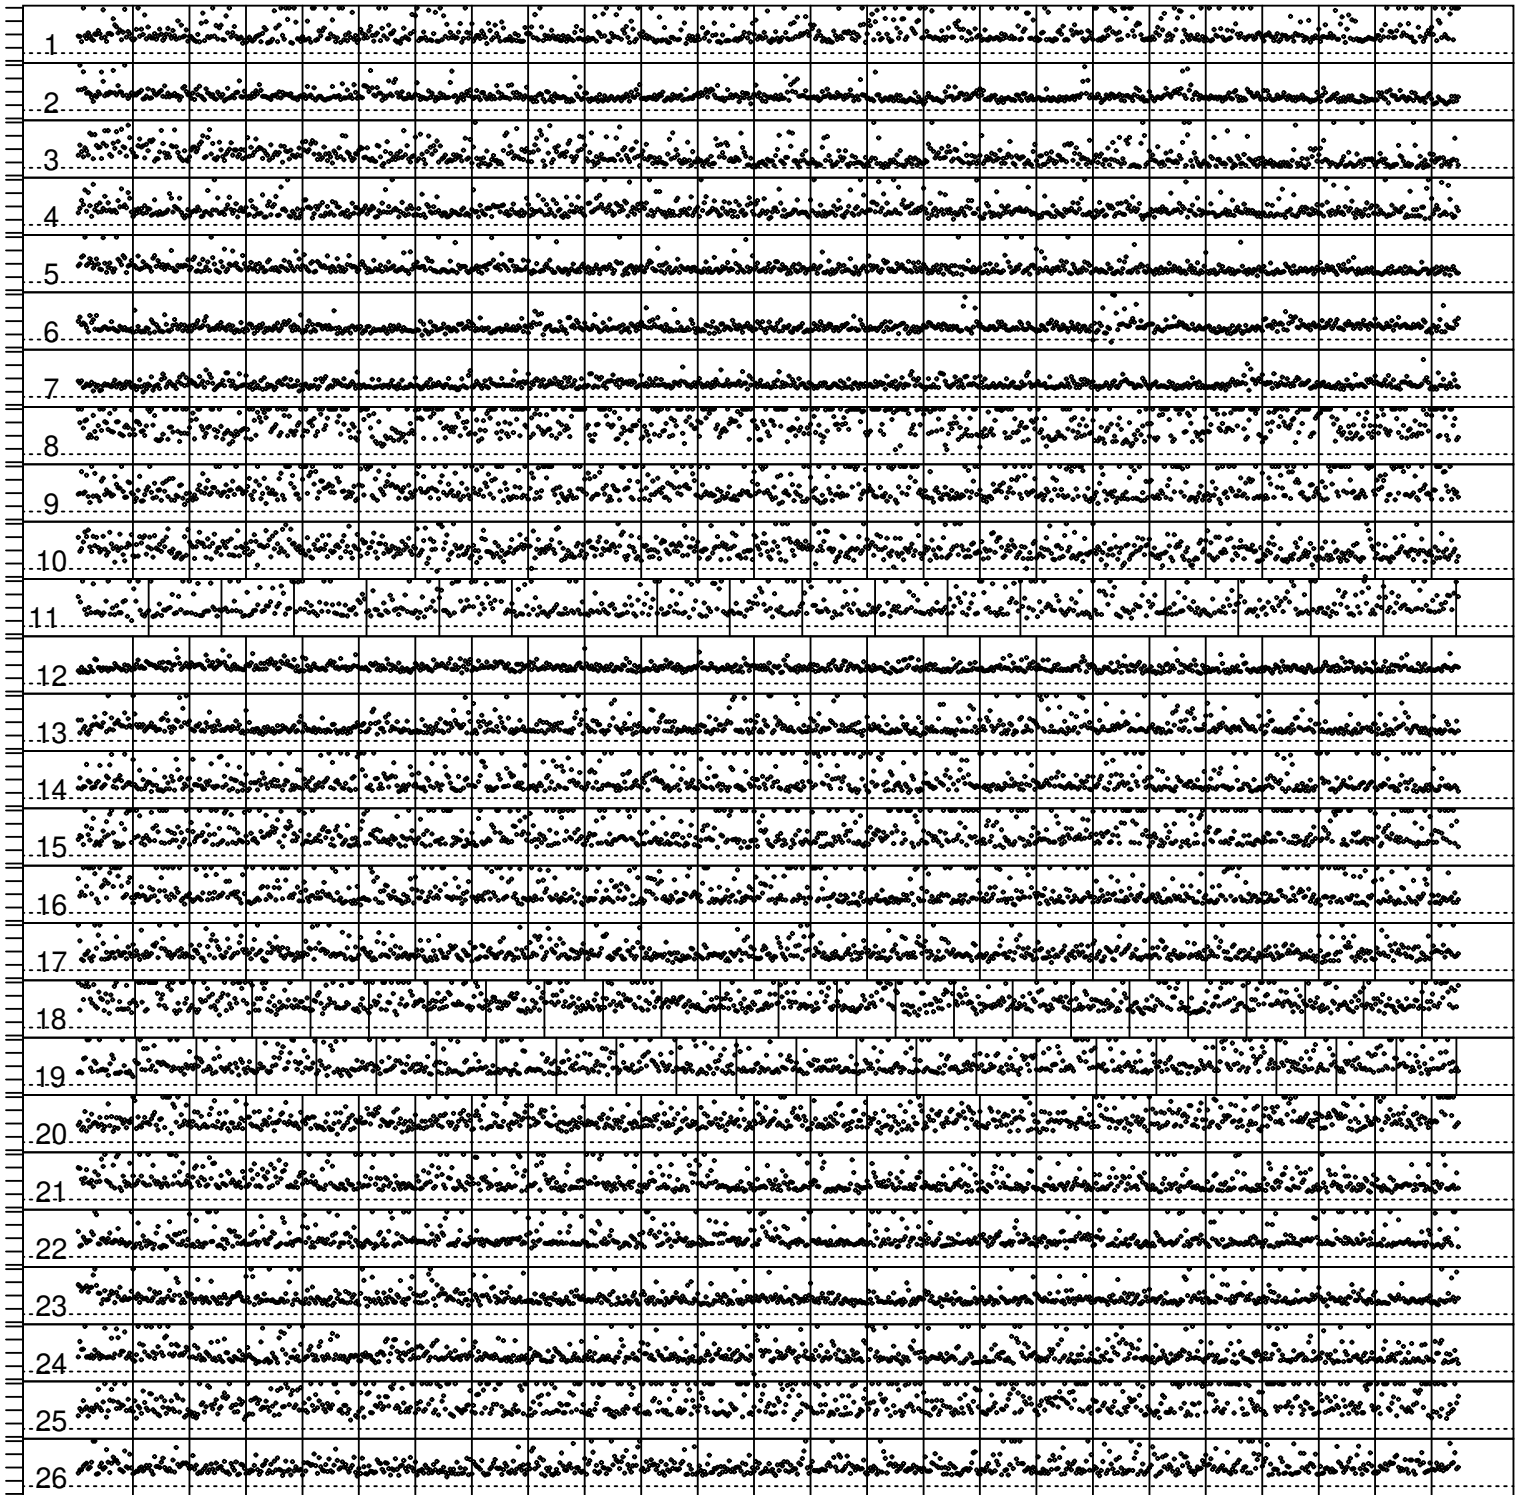

A time series plot of all RTs for all subjects (order, young, old, very old)  
for item recognition in Ratcliff, Thapar, & McKoon (2010)

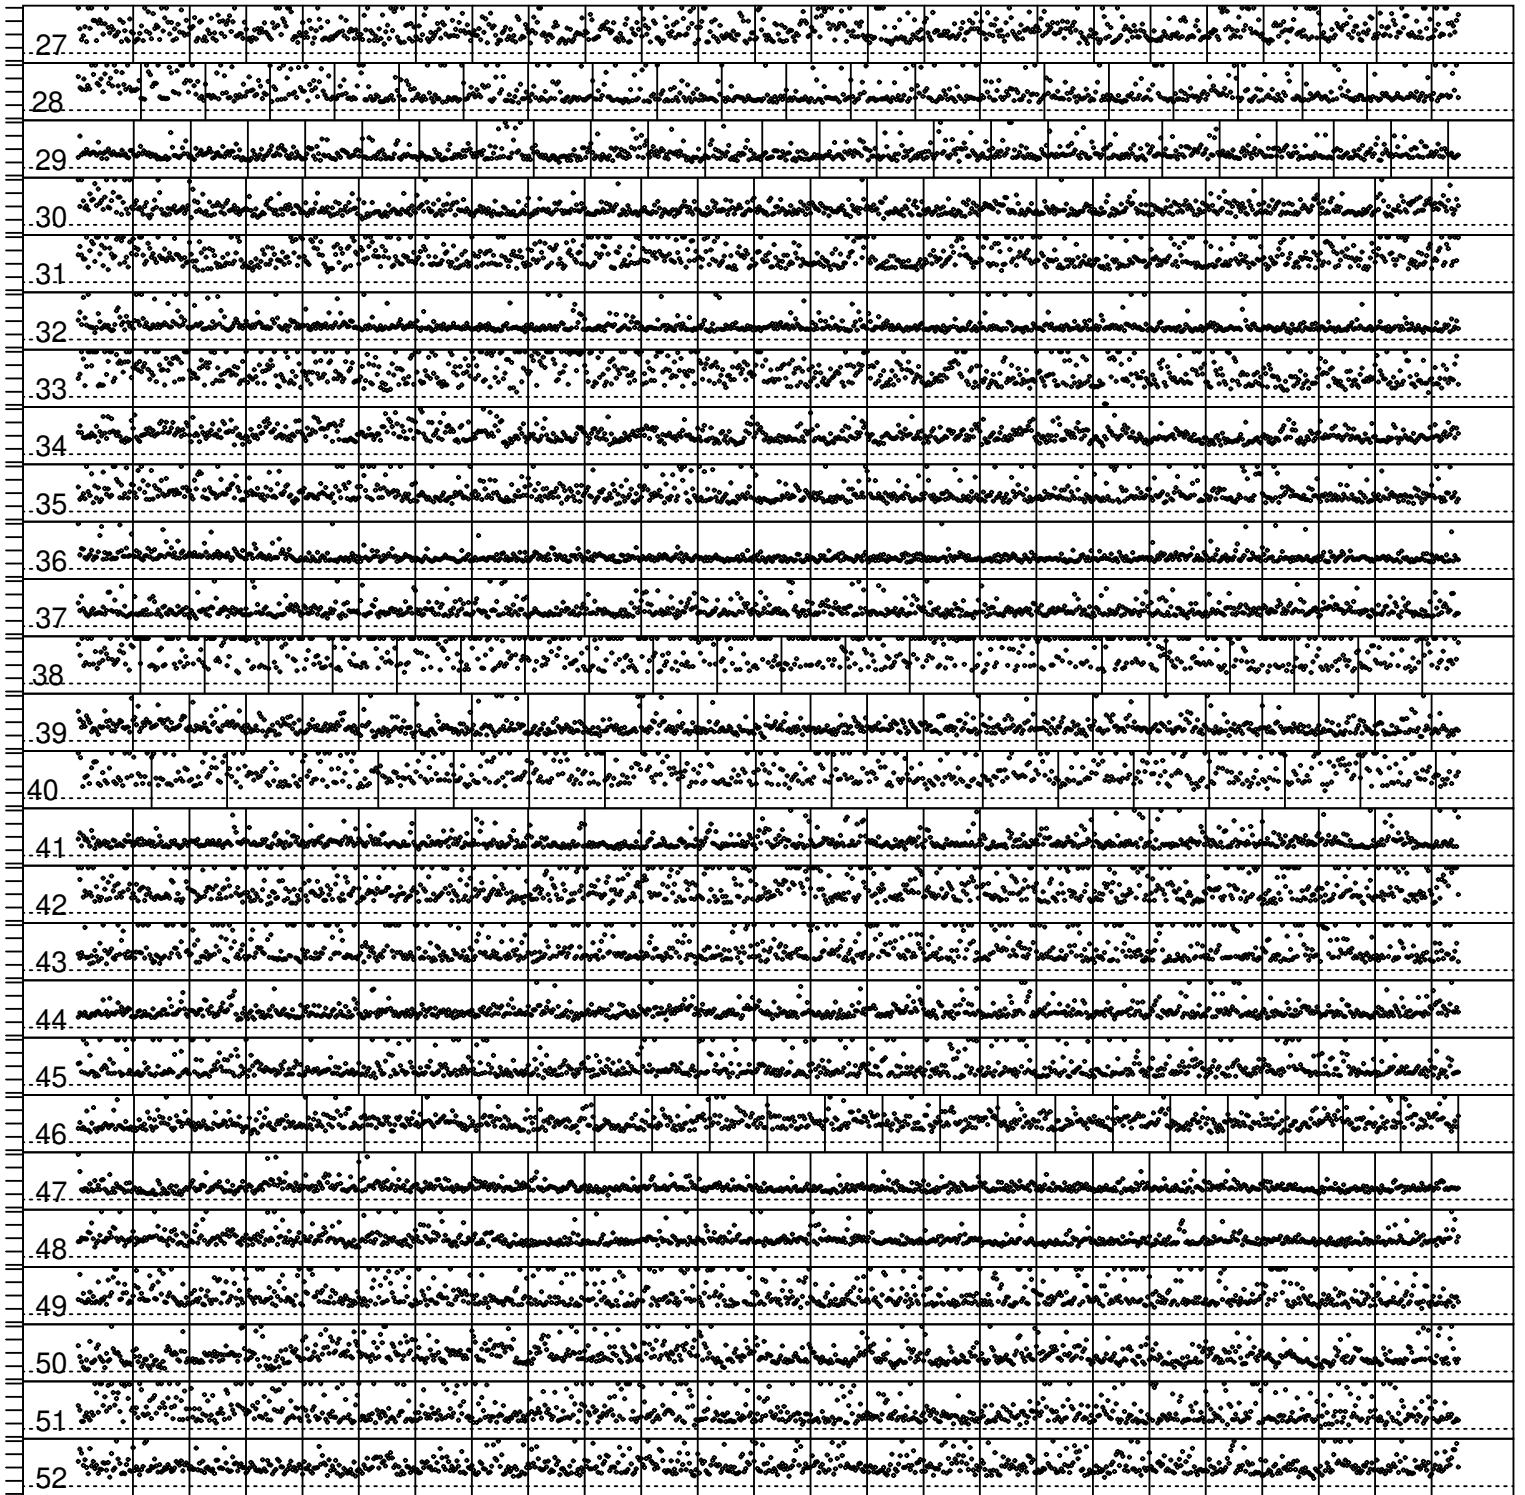

A time series plot of all RTs for all subjects (order, young, old, very old)  
for item recognition in Ratcliff, Thapar, & McKoon (2010)

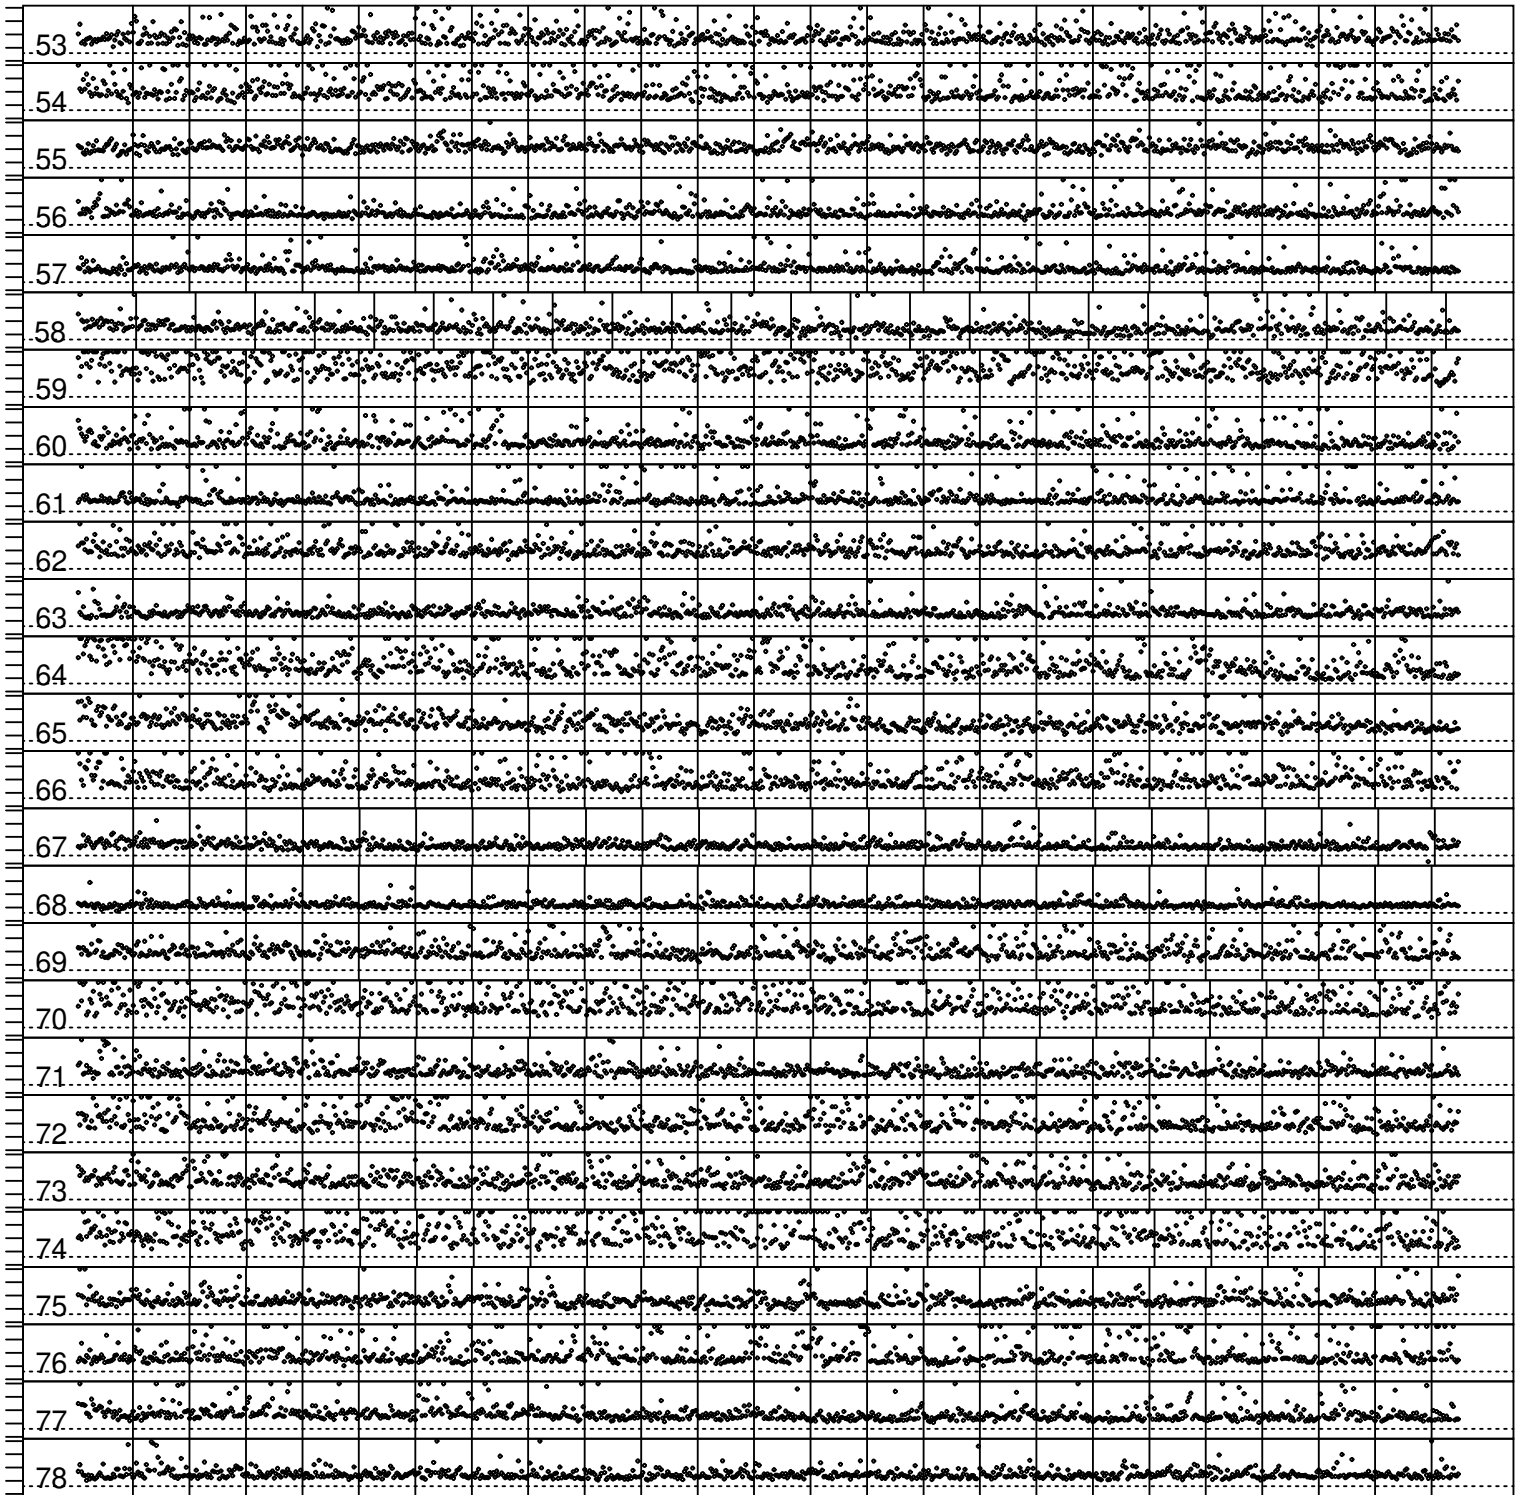

A time series plot of all RTs for all subjects (order, young, old, very old)  
for item recognition in Ratcliff, Thapar, & McKoon (2010)

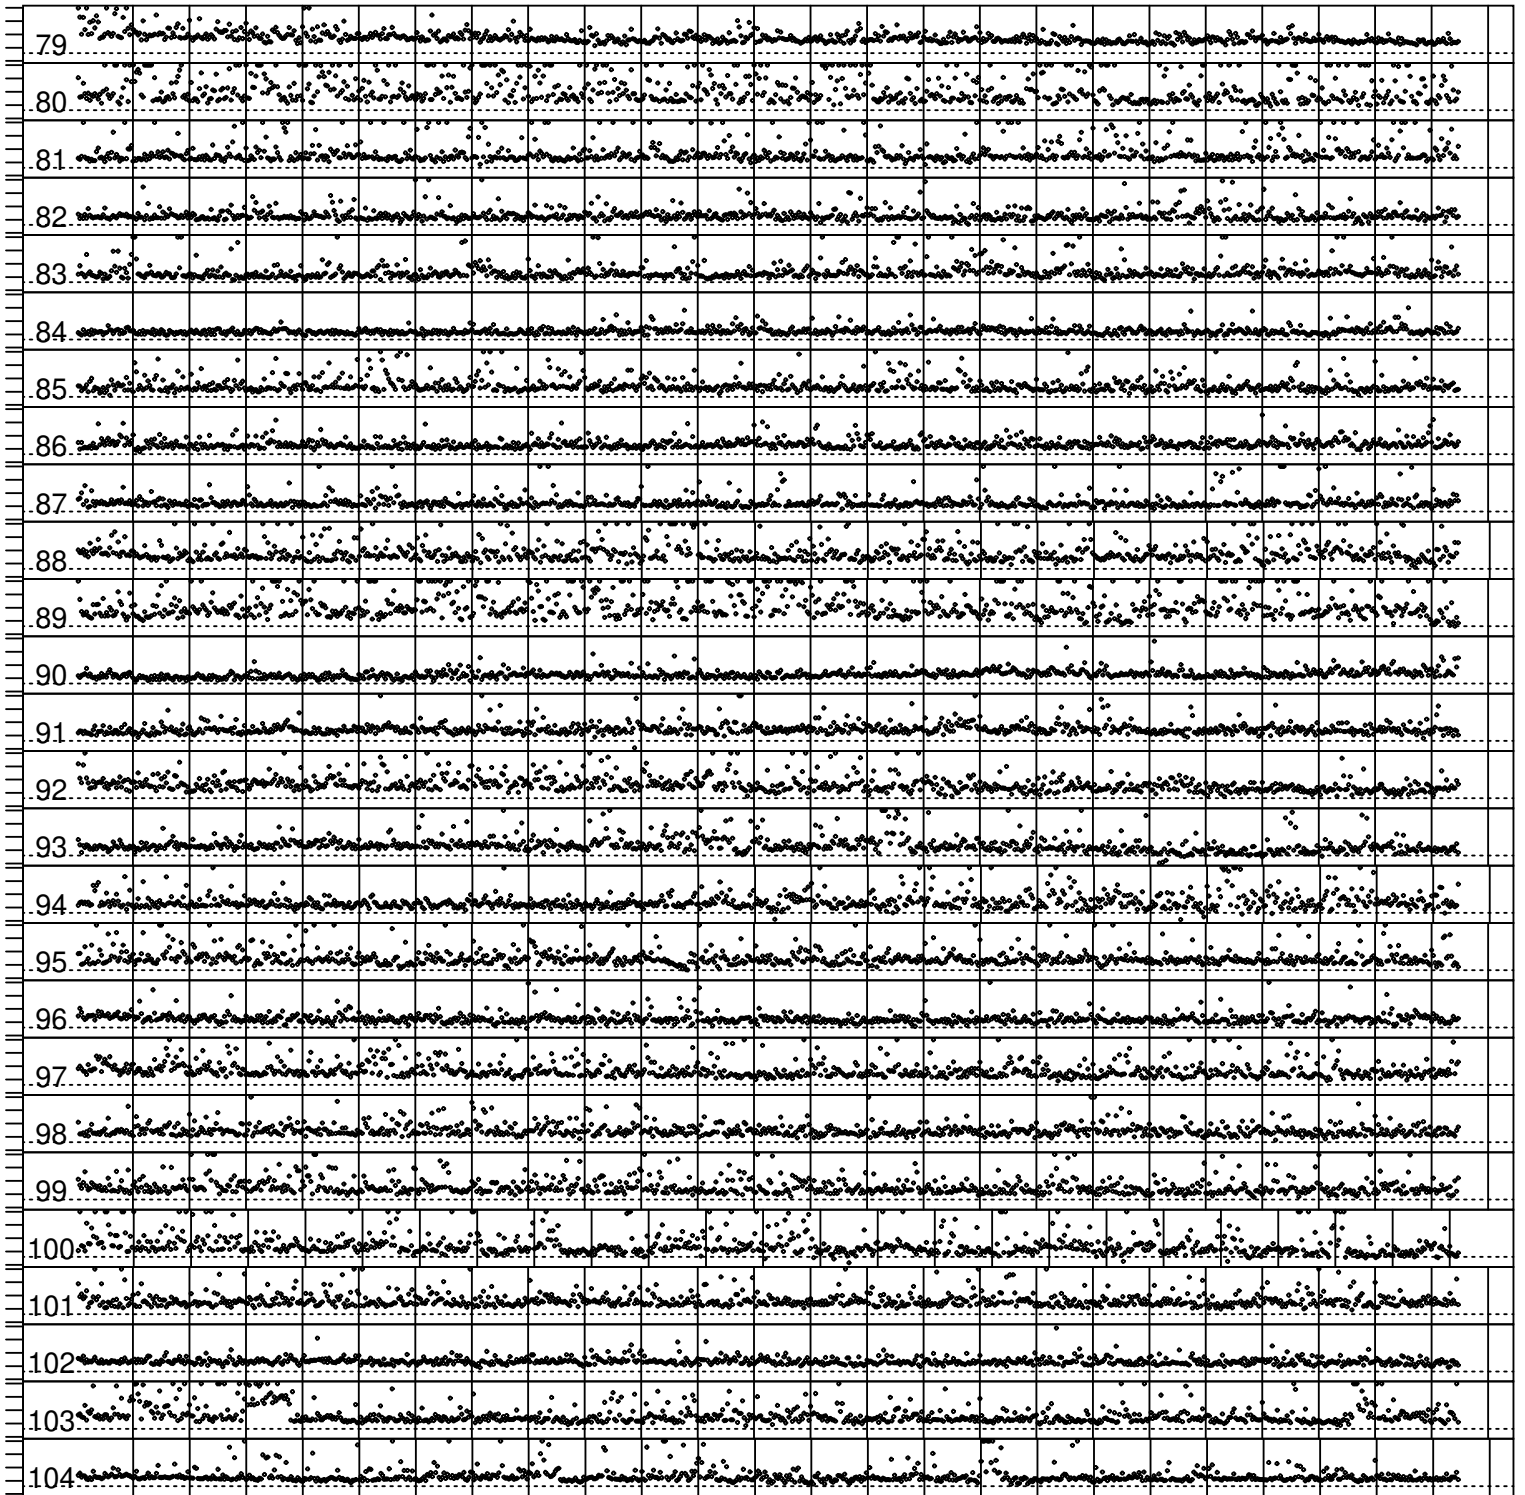

A time series plot of all RTs for all subjects (order, young, old, very old)  
for item recognition in Ratcliff, Thapar, & McKoon (2010)

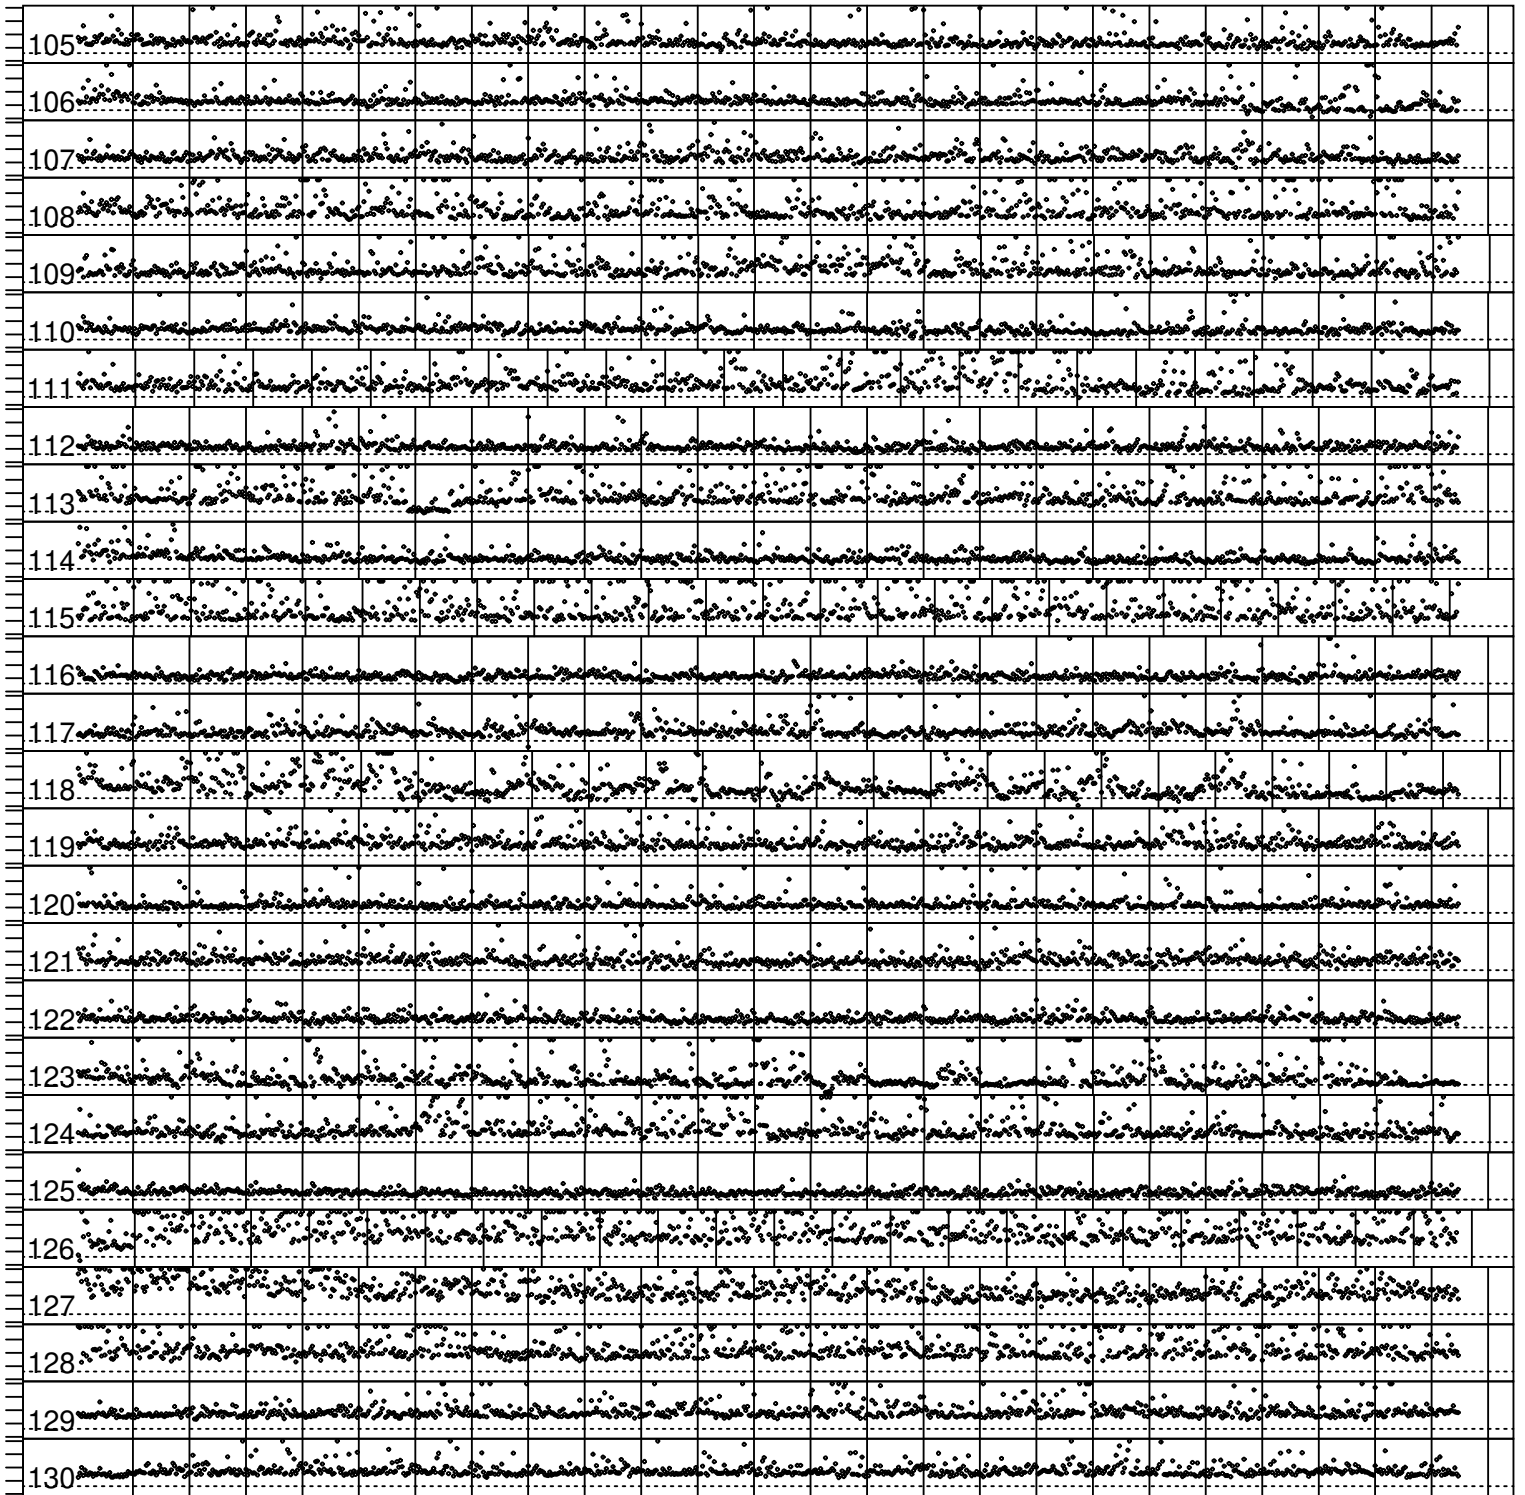

A time series plot of all RTs for all subjects for the BY task in Ratcliff & McKoon (2018)

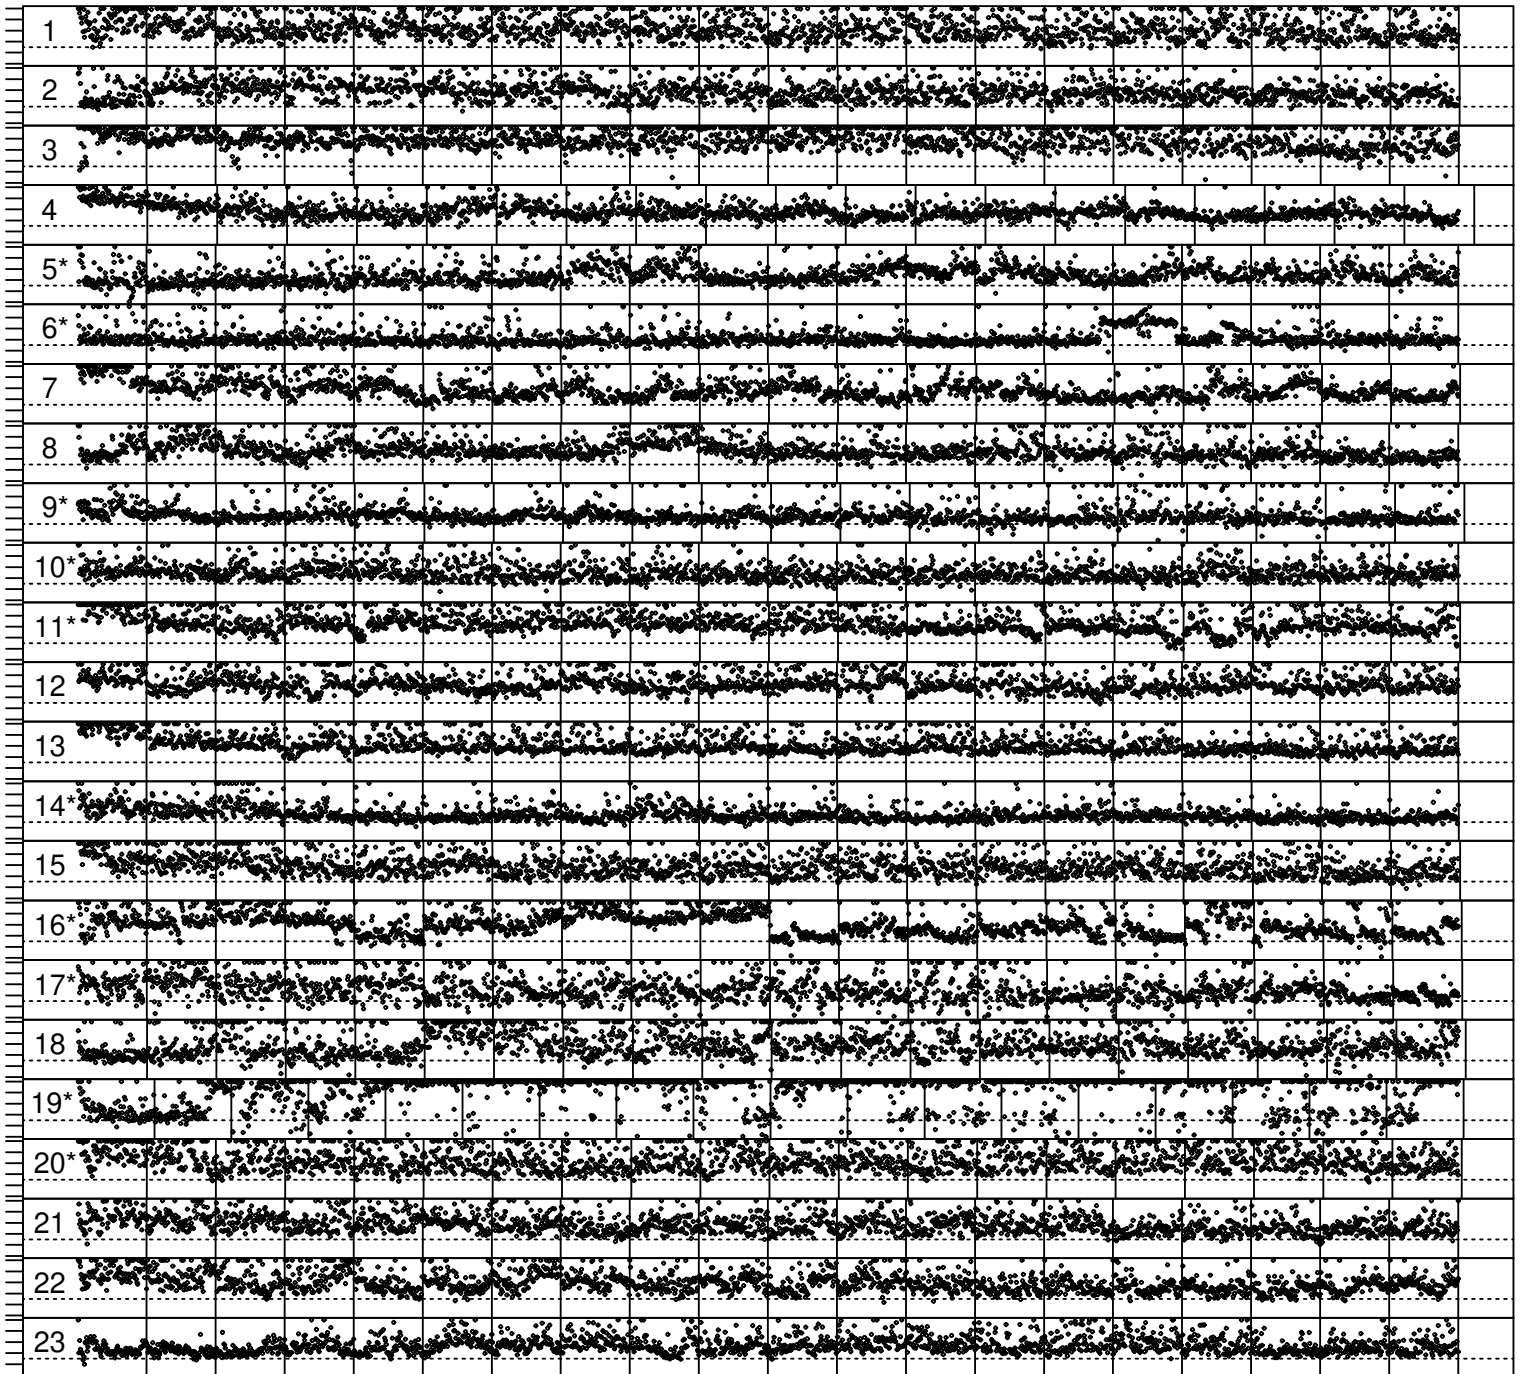

A time series plot of all RTs for all subjects for the Y25 task in Ratcliff & McKoon (2018)

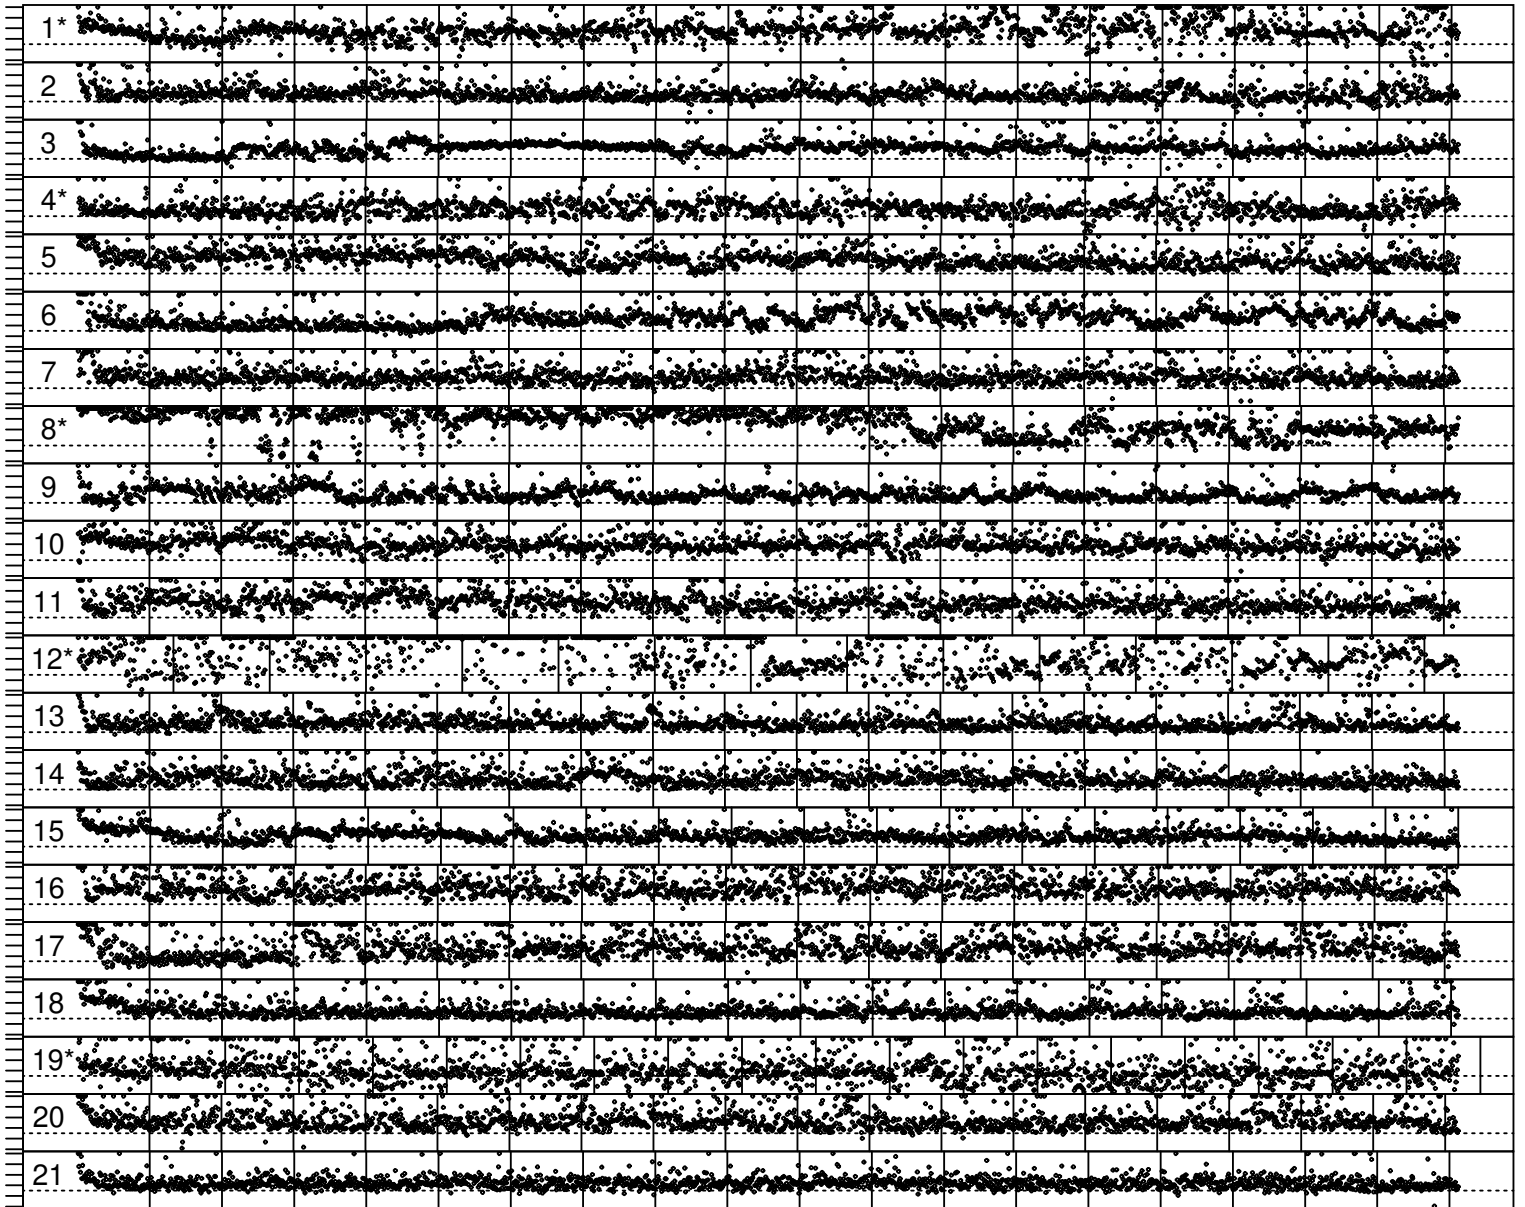

Supplement: NIHMS1754126-supplement-Appendix_-_Plots.pdf [file NIHMS1754126-supplement-Appendix_-_Plots.pdf]
